# 1 **GSK3 inhibition rescues growth and telomere dysfunction in** 2 **dyskeratosis congenita iPSC-derived type II alveolar epithelial** 3 **cells**

4  
5 Rafael J Fernandez III<sup>1,2,3</sup>, Zachary J G Gardner<sup>1,2,3</sup>, Katherine J Slovik<sup>4</sup>, Derek C Liberti<sup>2</sup>, Katrina N  
6 Estep<sup>2</sup>, Wenli Yang<sup>4,5</sup>, Qijun Chen<sup>6</sup>, Garrett T Santini<sup>3</sup>, Javier V Perez<sup>6</sup>, Sarah Root<sup>7</sup>, Ranvir Bhatia<sup>3</sup>,  
7 John W Tobias<sup>8</sup>, Apoorva Babu<sup>9,10</sup>, Michael P Morley<sup>9,10</sup>, David B Frank<sup>10,11</sup>, Edward E Morrissey<sup>4,9,10</sup>,  
8 Christopher J Lengner<sup>4,12,\*</sup>, F. Brad Johnson<sup>6,4,13\*</sup>

9  
10 <sup>1</sup> Medical Scientist Training Program, Perelman School of Medicine, University of Pennsylvania, Philadelphia, PA 19104, USA  
11 <sup>2</sup> Cell and Molecular Biology Graduate Group, Perelman School of Medicine, University of Pennsylvania, Philadelphia, PA 19104, USA  
12 <sup>3</sup> Perelman School of Medicine, University of Pennsylvania, Philadelphia, PA 19104, USA  
13 <sup>4</sup> Institute for Regenerative Medicine, University of Pennsylvania, Philadelphia, PA 19104, USA  
14 <sup>5</sup> Department of Medicine, Perelman School of Medicine, University of Pennsylvania, Philadelphia, PA 19104, USA  
15 <sup>6</sup> Department of Pathology and Laboratory Medicine, Perelman School of Medicine, University of Pennsylvania, Philadelphia, PA  
16 19104, USA  
17 <sup>7</sup> College of Arts and Sciences and Vagelos Scholars Program, University of Pennsylvania, Philadelphia, PA 19104, USA  
18 <sup>8</sup> Penn Genomic Analysis Core, Perelman School of Medicine, University of Pennsylvania, Philadelphia, Pennsylvania 19104, USA  
19 <sup>9</sup> Penn Cardiovascular Institute, University of Pennsylvania, Philadelphia, PA, 19104, USA  
20 <sup>10</sup> Penn-CHOP Lung Biology Institute, University of Pennsylvania, Philadelphia, PA, 19104, USA  
21 <sup>11</sup> Division of Pediatric Cardiology, Department of Pediatrics, Children's Hospital of Philadelphia, Philadelphia, PA 19104, USA  
22 <sup>12</sup> Department of Biomedical Sciences, School of Veterinary Medicine, University of Pennsylvania, Philadelphia, PA 19104, USA  
23 <sup>13</sup> Institute on Aging, University of Pennsylvania, Philadelphia, PA 19104, USA

## 24 **Co-Corresponding Authors ( \* )**

25 F. Brad Johnson, MD PhD  
26 Room 406, Stellar Chance Laboratories  
27 422 Curie Blvd  
28 Philadelphia, PA 19104  
29 [johnsonb@pennmedicine.upenn.edu](mailto:johnsonb@pennmedicine.upenn.edu)

Christopher J. Lengner, PhD  
Room 390EA, Old Vet  
3800 Spruce Street  
Philadelphia, PA 19104  
[lengner@vet.upenn.edu](mailto:lengner@vet.upenn.edu)

## 32 **Summary**

33 Dyskeratosis congenita (DC) is a rare genetic disorder characterized by deficiencies in telomere  
34 maintenance leading to very short telomeres and the premature onset of certain age-related  
35 diseases, including pulmonary fibrosis (PF). PF is thought to derive from epithelial failure, particularly  
36 that of type II alveolar epithelial (AT2) cells, which are highly dependent on Wnt signaling during  
37 development and adult regeneration. We use human iPSC-derived AT2 (iAT2) cells to model how  
38 short telomeres affect AT2 cells. Cultured DC mutant iAT2 cells accumulate shortened, uncapped  
39 telomeres and manifest defects in the growth of alveolospheres, hallmarks of senescence, and  
40 apparent defects in Wnt signaling. The GSK3 inhibitor, CHIR99021, which mimics the output of  
41 canonical Wnt signaling, enhances telomerase activity and rescues the defects. These findings  
42 support further investigation of Wnt agonists as potential therapies for DC related pathologies.  
43  
44

## 45 **Keywords**

46 Dyskeratosis congenita, Type II alveolar epithelial cells, pulmonary fibrosis, WNT

## 47 **Introduction**

48 Dyskeratosis congenita (DC) is a rare genetic disorder characterized by bone marrow failure, skin  
49 abnormalities, elevated risk of certain cancers, and liver and pulmonary fibrosis (PF). These  
50 pathologies are caused by abnormally shortened and uncapped telomeres arising from deficiencies in  
51 telomere maintenance, typically due to defects in the action of telomerase. Significant progress has  
52 been made in treating the bone marrow failure of DC patients, particularly *via* transplantation, but PF  
53 remains a major life-limiting pathology (Agarwal, 2018; Dietz et al., 2011).

54

55 PF is a subtype of interstitial pneumonia that is chronic and progressive, replacing the normal lace-  
56 like alveolar architecture with patchy, hyperproliferative fibrous tissue (Lederer and Martinez, 2018).  
57 Current therapies are only modestly effective and do not reverse the underlying fibrosis, and lung  
58 transplantation is not always an option (King et al., 2014; Lederer and Martinez, 2018; Richeldi et al.,  
59 2014; Valapour et al., 2020). While much of the early work in PF pathogenesis focused on unraveling  
60 the contributions of fibroblasts, genetic studies of families with a predisposition to PF argue that  
61 defects in alveolar epithelial cells and telomeres are key drivers of disease (Alder et al., 2015;  
62 Armanios et al., 2007; Bullard et al., 2005; Cogan et al., 2015; Haschek and Witschi, 1979; Kropski et  
63 al., 2015; Maitra et al., 2010; Thomas et al., 2002; Wang et al., 2009). Recent work in mice shows  
64 that dysfunctional AT2 cells, the putative stem cells of alveoli (Barkauskas et al., 2013), can lead to a  
65 progressive chronic fibrotic response similar to that seen in patients (Nureki et al., 2018).  
66 Furthermore, many of the same genes which when mutated cause DC have also been linked to  
67 familial PF (Alder et al., 2015; Armanios et al., 2007; Cogan et al., 2015; Kropski et al., 2017). In  
68 sporadic PF, both age and short telomeres are risk factors, and these risks are linked because age is  
69 associated with telomere shortening in the lung, particularly in AT2 cells (Alder et al., 2008; Everaerts  
70 et al., 2018). Consistent with a role for telomere dysfunction in driving PF, AT2 cells in sporadic PF  
71 express hallmarks of senescence and have shorter telomeres in fibrotic regions than those in non-

72 fibrotic regions (Disayabutr et al., 2016; Kropski et al., 2015; Snetselaar et al., 2017). Additionally, two  
73 human Mendelian randomization studies argue that short telomeres are a cause of PF (Duckworth et  
74 al., 2020; Telomeres Mendelian Randomization Collaboration et al., 2017). Murine studies also argue  
75 that telomere dysfunction and senescence in AT2 cells can drive PF (Naikawadi et al., 2016;  
76 Povedano et al., 2015; Yao et al., 2020). Although causality is thus evident, exactly how AT2 cell  
77 telomere dysfunction leads to PF is poorly understood.

78  
79 Previous work in our lab using mouse and human iPS-derived organoid models of DC intestinal  
80 defects uncovered a positive feedback loop by which telomere capping and canonical Wnt signaling  
81 support one another under normal conditions to maintain the intestinal stem cell niche (Woo et al.,  
82 2016; Yang et al., 2017). In the setting of telomere dysfunction, this virtuous cycle becomes vicious:  
83 the resulting suppression of Wnt signaling interferes with stem cell function directly and it also  
84 amplifies telomere dysfunction by diminishing Wnt-dependent expression of telomere maintenance  
85 factors, including the catalytic subunit of telomerase, TERT, and several of the telomere-protective  
86 shelterins. These studies demonstrated that Wnt pathway agonists can rescue these defects, raising  
87 the possibility that Wnt agonism could be of therapeutic benefit in DC. Given how telomere  
88 dysfunction in AT2 cells appears to drive PF, we wondered if Wnt agonism might be of benefit in  
89 pulmonary fibrosis. Wnt signaling is important for lung epithelial cell development (Frank et al., 2016;  
90 Goss et al., 2009; Li et al., 2002, 2005; Maretto et al., 2003; Okubo and Hogan, 2004; Ostrin et al.,  
91 2018; Shu et al., 2005) and regeneration of the adult lung in response to injury (Nabhan et al., 2018;  
92 Zacharias et al., 2018). On the one hand, there is evidence that WNTs may drive PF; for example  
93 they have been found to be upregulated in patients with pulmonary fibrosis (Chilosi et al., 2003;  
94 Königshoff et al., 2008, 2009). On the other hand, when the canonical Wnt transcriptional effector  $\beta$ -  
95 catenin is deleted in AT2 cells, mice are sensitized to bleomycin induced PF (Tanjore et al., 2013).  
96 Wnt signaling is complex and context dependent (Wiese et al., 2018), and the exact spatial, temporal

97 and cell type-specificity of Wnt signaling in PF remains an area of intense investigation. It is difficult to  
98 extrapolate from observational pathologic studies of fully developed PF to the potential functional  
99 impact of WNTs at earlier stages of the disease, and the large number of interacting cell types in PF  
100 lungs also makes it challenging to identify primary drivers in such studies. Furthermore, differences  
101 between mouse and human telomere biology together with the generally lower susceptibility of mice  
102 to PF makes mouse modeling difficult. We therefore generated AT2 cell organoids by directed  
103 differentiation of human iPSCs (iAT2 cells) to explore how telomere dysfunction might impact their  
104 function (Jacob et al., 2017, 2019).

105  
106 By comparing iAT2s that are isogenic except for an introduced mutation in the gene most often  
107 mutated in DC, X-linked *DKC1*, we show that mutant iAT2 cells become senescent in concert with  
108 telomere shortening and uncapping. iAT2 cells with short, uncapped telomeres exhibit gene  
109 expression changes consistent with decreased Wnt signaling, and treatment with GSK3 inhibitors,  
110 such as CHIR99021, rescues their growth and telomere dysfunction. These findings raise the  
111 possibility that Wnt agonists may be of benefit in rescuing the stem cell and telomere defects of AT2  
112 cells associated with PF in DC patients.

## 113 114 **Results**

### 115 116 **Engineering a *DKC1* mutation into iPS cells**

117 To model the AT2 cells from DC patients, we engineered a well characterized, causal DC mutation in  
118 *DKC1* (*DKC1 A386T*) (Agarwal et al., 2010; Batista et al., 2011; Woo et al., 2016) into the BU3  
119 *NKX2.1::GFP SFTPC::TdTomato (NGST)* human iPS cell line (Jacob et al., 2017). We established an  
120 isogenic pair of cell lines: an introduced mutant line and a corresponding wild-type line (Figure S1).  
121 Both iPS lines maintained markers of pluripotency and normal karyotypes after the introduction of the  
122 *DKC1 A386T* mutation (Figure S1).

123

124 Previous work (Agarwal et al., 2010; Batista et al., 2011; Woo et al., 2016) established that iPS cells  
125 with the *DKC1 A386T* mutation exhibit decreased telomerase activity resulting in telomere shortening  
126 with passage. We confirmed that telomerase activity was reduced, and telomeres shortened with  
127 successive passages, in the BU3 *NGST DKC1 A386T* iPS cell line when compared to its wild-type  
128 control (Figure S2A-C).

129

### 130 **iAT2 cells with short telomeres fail to form alveolospheres and grow in size**

131 We next differentiated these paired iPS cell lines into iAT2 cells using the protocol developed by  
132 Jacob et al. (See Figure 1A for differentiation strategy, Figure S3A-B for representative sorting  
133 strategies). Using iPSCs 25 passages after the introduction of the mutation initially yielded iAT2s that  
134 grew in a similar fashion to wild type, but which developed a growth defect characterized by lower  
135 alveolosphere formation efficiency as well as smaller alveolospheres. The phenotype became  
136 apparent by 50 days of culture (D50) and was dramatic by D70 (Figure 1A-C). In contrast, using  
137 iPSCs only five passages after the introduction of the mutation yielded iAT2s without any defects in  
138 alveolosphere growth or size at D70 (Figure S3C). These data indicate that the defects observed  
139 were due to progressive telomere shortening after introducing the *DKC1* mutation, and not the  
140 immediate effects of telomerase deficiency (or other potential deficiencies) caused by the *DKC1*  
141 *A386T* mutation *per se*.

142

143 Surfactant protein C (*SFTPC*) is a highly specific marker of AT2 cells (Kalina et al., 1992), and the  
144 yield of *SFTPC::TdTomato+* (*SFTPC+*) cells was reduced significantly at D70 in *DKC1* mutant  
145 cultures, while the percentage of *SFTPC+* cells generated at each time point was not different,  
146 suggesting that there is a defect in AT2 cell proliferation or survival (Figure 1D). Sorted *SFTPC+* cells  
147 from iAT2 cell alveolospheres maintained expression of multiple AT2 specific genes suggesting that  
148 the introduced mutation did not affect lineage specification (Figure 1E). Thus, DC iPS cells can

149 generate iAT2 cell alveolospheres, however these alveolospheres lose the capacity to self-renew  
150 with successive passaging.

151

### 152 **DC iAT2 cells develop hallmarks of senescence at late passage (D70)**

153 To better understand the AT2 cell defects, we further compared the wild type and mutant iAT2  
154 alveolospheres at different passages. Gene expression over successive passages of sorted *SFTPC*+  
155 cells from iAT2 alveolospheres showed decreases in proliferation markers (*MKI67* and *MCM2*) as  
156 well as an increase in expression of the cell cycle inhibitor *CDKN1A* (p21), and these changes were  
157 most pronounced in mutant alveolospheres (Figure 2A). D70 mutant iAT2 alveolospheres showed an  
158 increase in DNA damage marked by 53BP1 foci (Figure 2B), and an increased fraction of cells  
159 expressing p21 protein (Figure 2C), but no increase in apoptosis (Figure S3E). Measuring telomere  
160 length using qPCR, DC and WT iAT2 cells showed no significant change in average telomere length  
161 with passage, although average telomere lengths in mutants trended shorter than in WT (Figure  
162 S3F). However, measuring telomere lengths using TeSLA (Lai et al., 2017), which is more sensitive  
163 for the detection of short telomeres than most other techniques, revealed that DC iAT2 cells had a  
164 preponderance of short telomeres at D70 (Figure 2E-F). Consistent with this, DC iAT2 alveolospheres  
165 showed an increased number of telomere dysfunction induced foci (TIFs), a hallmark of uncapped  
166 telomeres (i.e. telomeres that signal DNA damage responses and cell cycle checkpoint arrest (Takai  
167 et al., 2003) (Figure 2D). These findings indicate that the short and uncapped telomeres that  
168 accumulate with passage of DC iAT2 cells lead them to senesce.

169

### 170 **RNA-seq reveals pathways differentially expressed in DC iAT2 cells, including those related to** 171 **Wnt signaling.**

172 To further understand changes in the DC iAT2 cells, we measured the gene expression of sorted  
173 *SFTPC*+ iAT2 cells using RNA-seq (Figure 3A). We found very few significantly differentially  
174 expressed genes when comparing wild type and mutant cells at D28 and D50, but a large number of  
175 differentially expressed genes at D70 (Figure 3B), arguing that the gene expression changes seen at

176 D70 are likely driven by uncapped telomeres. Gene Set Enrichment Analyses (GSEA) and Ingenuity  
177 Pathway Analysis (IPA) revealed an upregulation of the DNA damage response, the unfolded protein  
178 response (UPR), mitochondrial related functions (oxidative phosphorylation, the respiratory electron  
179 chain) and a downregulation of hypoxia related signaling, and hedgehog signaling along with other  
180 changes (See TableS2 for a full list). IPA analysis revealed similar changes as well as defects in  
181 multiple pathways controlled by inflammatory cytokines like IL1 $\beta$ , IL6, IL17 and others (See TableS3  
182 for the full lists). We found a marked upregulation in DC iAT2 cells of many pathways associated with  
183 pulmonary fibrosis (Table S1 for curated list of IPF related pathways, see Table S2-S3 for unedited  
184 analysis). These included the UPR (Lawson et al., 2008; Mulugeta et al., 2005), thyroid hormone  
185 metabolism (Yu et al., 2018), p53 signaling (Shetty et al., 2017), mitochondrial dysfunction and  
186 mitophagy (Chung et al., 2019; Yu et al., 2018), and caveolin function (Wang et al., 2006). This  
187 analysis also showed an upregulation of non-canonical Wnt signaling (Figure 3C), which correlated  
188 with a significant upregulation in *WNT5A* and *WNT11*, known non-canonical Wnt ligands (Figure 3D).  
189 Furthermore, almost every *FZD* gene, encoding co-receptors for canonical Wnt signaling, was down  
190 regulated in DC iAT2 cells (Figure 3E). Also, GSEA analysis found genes with TCF7 targets in their  
191 promoters are downregulated in DC iAT2 cells at D70 (Figure 3F). IPA of master regulators at D70  
192 revealed a decrease in genes controlled by lithium chloride (which can potentiate Wnt signaling) and  
193 TCF7 along with an upregulation of genes usually stimulated by Wnt pathway inhibitors (Figure 3G).  
194 GSEA also revealed a significant downregulation of targets of miR34a, a miRNA that we previously  
195 demonstrated negatively regulates many components of the Wnt pathway in response to uncapped  
196 telomeres (Figure 3H) (Yang et al., 2017). The genes encoding four of the six shelterins, proteins  
197 that bind and help maintain normal telomere function, are direct targets of the canonical Wnt  
198 transcriptional effector  $\beta$ -catenin, and two of these, *TINF2* and *POT1*, were downregulated in D70 DC  
199 iAT2 cells, which may contribute to telomere uncapping beyond simple telomere shortening (Figure  
200 3I) (Yang et al., 2017). These data indicate that Wnt signaling in AT2 cells is greatly affected by



201 shortened telomeres and that non-canonical Wnt signaling may be elevated while canonical ( $\beta$ -  
202 catenin-dependent) signaling may be diminished.

203

#### 204 **GSK3 inhibitors rescues the growth of DC iAT2 alveolospheres**

205 Given our previous work showing that GSK3 inhibition reverses telomere dysfunction and associated  
206 defects in intestinal models of DC, we attempted to rescue the DC iAT2 alveolosphere formation  
207 defect by treatment with CHIR99021, a well characterized GSK3 inhibitor, which stabilizes  $\beta$ -catenin  
208 and upregulates canonical Wnt target genes (Figure 4A). CHIR99021 rescued the alveolosphere  
209 growth defect of iAT2 cells in a dose dependent fashion (Figure 4B-C). Furthermore, if  
210 alveolospheres were cultured continuously prior to D70 with CHIR99021, this prevented the growth  
211 defect from emerging (Figure S4A-B). We also tested another GSK3 inhibitor, CHIR98014, which  
212 similarly rescued growth of the mutant iAT2 cells (Figure S4C). These findings suggest that GSK3  
213 inhibition rescued the growth of DC iAT2 alveolospheres.

214

#### 215 **CHIR99021 downregulates senescence markers and resolves TIFs in DC iAT2 alveolospheres**

216 We ultimately investigated how CHIR99021 affects the telomere status of DC iAT2s. CHIR treated  
217 iAT2 cells showed fewer cells with 53BP1 foci, fewer p21+ cells and fewer TIF+ cells (Figure 4D-F).  
218 TeSLA revealed no apparent changes in average telomere length or in the frequency of shortest  
219 detectable telomeres (Figure S4D-E). However, iAT2 cell telomerase activity was increased in mutant  
220 cells treated with CHIR99021 to levels that, remarkably, were even higher than seen in WT cells  
221 (Figure 4G). Together, these data argue that GSK3 inhibition not only rescues the growth of DC iAT2  
222 cells, but it also rescues telomere defects, most likely through upregulation of telomerase activity that  
223 could extend and recap telomeres that are shorter than those that can be detected by TeSLA.

224

#### 225 **Discussion**

226 We used isogenic human iPS cell lines to generate DC mutant iAT2 cells with shortened telomeres to  
227 interrogate how telomere dysfunction can affect AT2 cell function. We found that shortened and



228 uncapped telomeres are associated with a defect in alveolosphere formation by iAT2 cells. This  
229 defect is characterized by senescent iAT2 cells that upregulate many pathways associated with  
230 pulmonary fibrosis including the UPR, mitochondrial biogenesis and function, thyroid hormone  
231 signaling, and p53 signaling. DC mutant iAT2 cells also suppress canonical Wnt signaling, and  
232 consistent with this, GSK3 inhibition rescues telomerase activity, telomere capping, and  
233 alveolosphere formation. This system provides a new preclinical model to better understand PF  
234 pathogenesis and how potential new PF therapeutics affect AT2 cell function in the context of  
235 telomere dysfunction.

236

237 Wnt signaling is a complex pathway, broken down into two major categories:  $\beta$ -catenin dependent (  
238 canonical) signaling and  $\beta$ -catenin independent (non-canonical) signaling. These distinctions can also  
239 be blurred as evidenced by studies that show how non-canonical ligands, such as *WNT5A*, can  
240 activate both arms of Wnt signaling (van Amerongen et al., 2012; Mikels and Nusse, 2006). These  
241 complexities therefore make the conflicting reports about whether  $\beta$ -catenin dependent Wnt signaling  
242 is of benefit (Tanjore et al., 2013) or of harm in pulmonary fibrosis (Douglas et al., 2006; Henderson  
243 et al., 2010; Kim et al., 2011; Königshoff et al., 2008; McDonough et al., 2019) unsurprising. Given  
244 the heterogeneity of the disease both in space and time and the context dependence of Wnt  
245 signaling, these studies can often only capture a snapshot of the fibrotic response. Furthermore, there  
246 are clear differences between mice and humans with regard to telomere and lung biology (Basil and  
247 Morrissey, 2020; Gomes et al., 2011). These limitations highlight the need for human models capable  
248 of assessing the spatial, temporal, and cell type specific properties of Wnt signaling in PF  
249 pathogenesis.

250

251 Our study also provides evidence of upregulation of  $\beta$ -catenin-independent signaling in DC iAT2 cells  
252 and that re-activating  $\beta$ -catenin dependent Wnt signaling using GSK3 inhibitors might provide support

253 for AT2 cell proliferation in the context of telomere dysfunction. It is tempting to extrapolate from other  
254 models of lung disease to understand how the activity of the  $\beta$ -catenin dependent Wnt pathway might  
255 be of benefit in pulmonary fibrosis.  $\beta$ -catenin dependent Wnt signaling improved regeneration and  
256 survival in a model of emphysema (Kneidinger et al., 2011), and inhibition of *WNT5A*, and thus  
257 presumably some component of  $\beta$ -catenin independent Wnt signaling, improved repair in a model of  
258 COPD (Baarsma et al., 2017). Our work, consistent with previous studies, argues that  $\beta$ -catenin  
259 dependent Wnt signaling supports AT2 cell telomere capping and proliferation, which may of benefit  
260 during regeneration and repair (Nabhan et al., 2018; Uhl et al., 2015; Zacharias et al., 2018).

261

262 Our previous work uncovered a positive feedback loop between Wnt signaling and telomeres in the  
263 intestine (Woo et al., 2016; Yang et al., 2017). Here we show that aspects of the Wnt-telomere  
264 feedback loop appear to be at play in AT2 cells (Fernandez and Johnson, 2018), arguing that this  
265 connection between Wnt and telomeres is present not just in proliferative tissues such as the  
266 intestine, but also in lung cells, cells from a tissue that are normally quiescent but proliferate in  
267 response to injury. Previous work highlighted the importance of telomerase during alveolar  
268 regeneration (Driscoll et al., 2000; Lee et al., 2009). Furthermore, given previous demonstrations that  
269 *TERT* expression and telomerase activity can be stimulated by Wnt (Hoffmeyer et al., 2012; Jaitner et  
270 al., 2012; Zhang et al., 2012), we expected an upregulation of telomerase activity in iAT2 cells when  
271 treated with GSK3 inhibitors. However, we did not anticipate the enhanced responsiveness of DC  
272 iAT2 cells to CHIR99021. Although we have not explored the underlying mechanism, these findings  
273 suggest that cells with compromised telomere maintenance can prime themselves to upregulate  
274 telomerase.

275

276 This Wnt-telomere feedback loop might not be the only regulatory loop at play in AT2 cells. Given our  
277 evidence of upregulation of mitochondrial processes in DC iAT2 cells and how telomere dysfunction

278 can drive mitochondrial dysfunction (Sahin et al., 2011) and how mitochondrial dysfunction can drive  
279 telomere dysfunction (Guha et al., 2018; Passos et al., 2007; Qian et al., 2019), we hypothesize that  
280 telomeres might be an integrator of multiple cellular stress responses. Furthermore, our finding of the  
281 upregulation of genes associated with the UPR argues that telomere dysfunction could drive the  
282 UPR. Many reports have described connections between senescence, a usual consequence of  
283 telomere dysfunction, and the UPR (Pluquet et al., 2015) and we hypothesize that the UPR might in  
284 turn drive telomere dysfunction. These multiple integrated loops might help explain how these various  
285 vital cellular processes combine to cause dysfunction in AT2 cells in PF (Katzen and Beers, 2020).

286  
287 Recent work, using mouse AT2 cell organoids, has elucidated a developmental trajectory by which  
288 AT2 cells can differentiate *via* an intermediate state into type I alveolar epithelial (AT1) cells in  
289 response to bleomycin injury (Choi et al., 2020; Kobayashi et al., 2020; Strunz et al., 2020). Of note,  
290 the intermediate cells are characterized by high levels of p53 signaling and DNA damage which  
291 resolves with their final transition to an AT1 cell fate (Kobayashi et al., 2020), arguing that repairing  
292 DNA damage, potentially at telomeres, is an important step in the transition to an AT1 cell.  
293 Furthermore, many of the pathways that promote the differentiation of AT2 cells into AT1 cells are  
294 downregulated in DC iAT2 cells, including those involving IL1 $\beta$ , glycolysis, and HIF1 $\alpha$  (Choi et al.,  
295 2020). We speculate that DC AT2 cells with short uncapped telomeres may have trouble suppressing  
296 DNA damage at telomeres and therefore in differentiating into AT1 cells during regeneration, perhaps  
297 thus contributing to fibrosis. Testing this idea in the human iPSC-derived alveolosphere model will  
298 require technical advances to enable the generation of AT1 cells. Regardless, our DC iAT2 cell model  
299 recapitulates many hallmarks of PF AT2 cells and offers a new system to probe the underlying  
300 biology of PF.

301

302

## 303 References

- 304 Agarwal, S. (2018). Evaluation and Management of Hematopoietic Failure in Dyskeratosis Congenita. *Hematol. Oncol. Clin. North Am.* *32*, 669–685.
- 306 Agarwal, S., Loh, Y.-H., McLoughlin, E.M., Huang, J., Park, I.-H., Miller, J.D., Huo, H., Okuka, M., Dos Reis, R.M., Loewer, S., et al. (2010). Telomere elongation in induced pluripotent stem cells from dyskeratosis congenita patients. *Nature* *464*, 292–296.
- 309 Alder, J.K., Chen, J.J.-L., Lancaster, L., Danoff, S., Su, S.-C., Cogan, J.D., Vulto, I., Xie, M., Qi, X., Tuder, R.M., et al. (2008). Short telomeres are a risk factor for idiopathic pulmonary fibrosis. *Proc. Natl. Acad. Sci. U. S. A.* *105*, 13051–13056.
- 312 Alder, J.K., Stanley, S.E., Wagner, C.L., Hamilton, M., Hanumanthu, V.S., and Armanios, M. (2015). Exome sequencing identifies mutant TINF2 in a family with pulmonary fibrosis. *Chest* *147*, 1361–1368.
- 314 van Amerongen, R., Fuerer, C., Mizutani, M., and Nusse, R. (2012). Wnt5a can both activate and repress Wnt/ $\beta$ -catenin signaling during mouse embryonic development. *Dev. Biol.* *369*, 101–114.
- 316 Armanios, M.Y., Chen, J.J.-L., Cogan, J.D., Alder, J.K., Ingersoll, R.G., Markin, C., Lawson, W.E., Xie, M., Vulto, I., Phillips, J.A., et al. (2007). Telomerase mutations in families with idiopathic pulmonary fibrosis. *N. Engl. J. Med.* *356*, 1317–1326.
- 319 Baarsma, H.A., Skronska-Wasek, W., Mutze, K., Ciolek, F., Wagner, D.E., John-Schuster, G., Heinzemann, K., Günther, A., Bracke, K.R., Dagouassat, M., et al. (2017). Noncanonical WNT-5A signaling impairs endogenous lung repair in COPD. *J. Exp. Med.* *214*, 143–163.
- 322 Barkauskas, C.E., Crouce, M.J., Rackley, C.R., Bowie, E.J., Keene, D.R., Stripp, B.R., Randell, S.H., Noble, P.W., and Hogan, B.L.M. (2013). Type 2 alveolar cells are stem cells in adult lung. *J. Clin. Invest.* *123*, 3025–3036.
- 324 Basil, M.C., and Morrissey, E.E. (2020). Lung regeneration: a tale of mice and men. *Semin. Cell Dev. Biol.* *100*, 88–100.
- 325 Batista, L.F.Z., Pech, M.F., Zhong, F.L., Nguyen, H.N., Xie, K.T., Zaug, A.J., Crary, S.M., Choi, J., Sebastiano, V., Cherry, A., et al. (2011). Telomere shortening and loss of self-renewal in dyskeratosis congenita induced pluripotent stem cells. *Nature* *474*, 399–402.
- 328 Bullard, J.E., Wert, S.E., Whitsett, J.A., Dean, M., and Nogee, L.M. (2005). ABCA3 mutations associated with pediatric interstitial lung disease. *Am. J. Respir. Crit. Care Med.* *172*, 1026–1031.
- 330 Cawthon, R.M. (2002). Telomere measurement by quantitative PCR. *Nucleic Acids Res.* *30*, e47.
- 331 Chilosi, M., Poletti, V., Zamò, A., Lestani, M., Montagna, L., Piccoli, P., Pedron, S., Bertaso, M., Scarpa, A., Murer, B., et al. (2003). Aberrant Wnt/beta-catenin pathway activation in idiopathic pulmonary fibrosis. *Am. J. Pathol.* *162*, 1495–1502.
- 333 Choi, J., Park, J.-E., Tsagkogeorga, G., Yanagita, M., Koo, B.-K., Han, N., and Lee, J.-H. (2020). Inflammatory Signals Induce AT2 Cell-Derived Damage-Associated Transient Progenitors that Mediate Alveolar Regeneration. *Cell Stem Cell*.
- 335 Chung, K.-P., Hsu, C.-L., Fan, L.-C., Huang, Z., Bhatia, D., Chen, Y.-J., Hisata, S., Cho, S.J., Nakahira, K., Imamura, M., et al. (2019). Mitofusins regulate lipid metabolism to mediate the development of lung fibrosis. *Nat. Commun.* *10*, 3390.
- 337 Cogan, J.D., Kropski, J.A., Zhao, M., Mitchell, D.B., Rives, L., Markin, C., Garnett, E.T., Montgomery, K.H., Mason, W.R., McKean, D.F., et al. (2015). Rare variants in RTEL1 are associated with familial interstitial pneumonia. *Am. J. Respir. Crit. Care Med.* *191*, 646–655.
- 340 Dietz, A.C., Orchard, P.J., Baker, K.S., Giller, R.H., Savage, S.A., Alter, B.P., and Tolar, J. (2011). Disease-specific hematopoietic cell transplantation: nonmyeloablative conditioning regimen for dyskeratosis congenita. *Bone Marrow Transplant.* *46*, 98–104.
- 343 Disayabutr, S., Kim, E.K., Cha, S.-I., Green, G., Naikawadi, R.P., Jones, K.D., Golden, J.A., Schroeder, A., Matthay, M.A., Kukreja, J., et al. (2016). miR-34 miRNAs Regulate Cellular Senescence in Type II Alveolar Epithelial Cells of Patients with Idiopathic Pulmonary Fibrosis. *PLoS One* *11*, e0158367.

- 346 Dolgavev, I. (2020). msigdb: MSigDB Gene Sets for Multiple Organisms in a Tidy Data Format.
- 347 Douglas, I.S., Diaz del Valle, F., Winn, R.A., and Voelkel, N.F. (2006). Beta-catenin in the fibroproliferative response to  
348 acute lung injury. *Am. J. Respir. Cell Mol. Biol.* *34*, 274–285.
- 349 Driscoll, B., Buckley, S., Bui, K.C., Anderson, K.D., and Warburton, D. (2000). Telomerase in alveolar epithelial  
350 development and repair. *Am. J. Physiol. Lung Cell. Mol. Physiol.* *279*, L1191–L1198.
- 351 Duckworth, A., Gibbons, M.A., Allen, R.J., Almond, H., Beaumont, R.N., Wood, A.R., Lunnon, K.R., Lindsay, M.A., Wain,  
352 L.V., Tyrrell, J., et al. (2020). Evidence that telomere length is causal for Idiopathic Pulmonary Fibrosis but not Chronic  
353 Obstructive Pulmonary Disease: A Mendelian Randomisation Study (medRxiv).
- 354 Everaerts, S., Lammertyn, E.J., Martens, D.S., De Sadeleer, L.J., Maes, K., van Batenburg, A.A., Goldschmeding, R., van  
355 Moorsel, C.H.M., Dupont, L.J., Wuyts, W.A., et al. (2018). The aging lung: tissue telomere shortening in health and  
356 disease. *Respir. Res.* *19*, 95.
- 357 Fernandez, R.J., 3rd, and Johnson, F.B. (2018). A regulatory loop connecting WNT signaling and telomere capping:  
358 possible therapeutic implications for dyskeratosis congenita. *Ann. N. Y. Acad. Sci.* *1418*, 56–68.
- 359 Frank, D.B., Peng, T., Zepp, J.A., Snitow, M., Vincent, T.L., Penkala, I.J., Cui, Z., Herriges, M.J., Morley, M.P., Zhou, S.,  
360 et al. (2016). Emergence of a Wave of Wnt Signaling that Regulates Lung Alveologenesis by Controlling Epithelial Self-  
361 Renewal and Differentiation. *Cell Rep.* *17*, 2312–2325.
- 362 Gomes, N.M.V., Ryder, O.A., Houck, M.L., Charter, S.J., Walker, W., Forsyth, N.R., Austad, S.N., Venditti, C., Pagel, M.,  
363 Shay, J.W., et al. (2011). Comparative biology of mammalian telomeres: hypotheses on ancestral states and the roles of  
364 telomeres in longevity determination. *Aging Cell* *10*, 761–768.
- 365 Goss, A.M., Tian, Y., Tsukiyama, T., Cohen, E.D., Zhou, D., Lu, M.M., Yamaguchi, T.P., and Morrissey, E.E. (2009).  
366 Wnt2/2b and beta-catenin signaling are necessary and sufficient to specify lung progenitors in the foregut. *Dev. Cell* *17*,  
367 290–298.
- 368 Guha, M., Srinivasan, S., Johnson, F.B., Ruthel, G., Guja, K., Garcia-Diaz, M., Kaufman, B.A., Glineburg, M.R., Fang, J.,  
369 Nakagawa, H., et al. (2018). hnRNPA2 mediated acetylation reduces telomere length in response to mitochondrial  
370 dysfunction. *PLoS One* *13*, e0206897.
- 371 Hadley Wickham, J.B. (2019). readxl: Read Excel Files.
- 372 Haschek, W.M., and Witschi, H. (1979). Pulmonary fibrosis--a possible mechanism. *Toxicol. Appl. Pharmacol.* *51*, 475–  
373 487.
- 374 Henderson, W.R., Jr, Chi, E.Y., Ye, X., Nguyen, C., Tien, Y.-T., Zhou, B., Borok, Z., Knight, D.A., and Kahn, M. (2010).  
375 Inhibition of Wnt/beta-catenin/CREB binding protein (CBP) signaling reverses pulmonary fibrosis. *Proc. Natl. Acad. Sci. U.*  
376 *S. A.* *107*, 14309–14314.
- 377 Herbert, B.-S., Hochreiter, A.E., Wright, W.E., and Shay, J.W. (2006). Nonradioactive detection of telomerase activity  
378 using the telomeric repeat amplification protocol. *Nat. Protoc.* *1*, 1583–1590.
- 379 Hoffmeyer, K., Raggioli, A., Rudloff, S., Anton, R., Hierholzer, A., Del Valle, I., Hein, K., Vogt, R., and Kemler, R. (2012).  
380 Wnt/ $\beta$ -catenin signaling regulates telomerase in stem cells and cancer cells. *Science* *336*, 1549–1554.
- 381 Jacob, A., Morley, M., Hawkins, F., McCauley, K.B., Jean, J.C., Heins, H., Na, C.-L., Weaver, T.E., Vedaie, M., Hurley, K.,  
382 et al. (2017). Differentiation of Human Pluripotent Stem Cells into Functional Lung Alveolar Epithelial Cells. *Cell Stem Cell*  
383 *21*, 472–488.e10.
- 384 Jacob, A., Vedaie, M., Roberts, D.A., Thomas, D.C., Villacorta-Martin, C., Alysandratos, K.-D., Hawkins, F., and Kotton,  
385 D.N. (2019). Derivation of self-renewing lung alveolar epithelial type II cells from human pluripotent stem cells. *Nat.*  
386 *Protoc.*
- 387 Jaitner, S., Reiche, J.A., Schäffauer, A.J., Hiendlmeyer, E., Herbst, H., Brabletz, T., Kirchner, T., and Jung, A. (2012).  
388 Human telomerase reverse transcriptase (hTERT) is a target gene of  $\beta$ -catenin in human colorectal tumors. *Cell Cycle* *11*,  
389 3331–3338.

- 390 Joglekar, M.V., Satoor, S.N., Wong, W.K.M., Cheng, F., Ma, R.C.W., and Hardikar, A.A. (2020). An Optimised Step-by-  
391 Step Protocol for Measuring Relative Telomere Length. *Methods Protoc* 3.
- 392 Kalina, M., Mason, R.J., and Shannon, J.M. (1992). Surfactant protein C is expressed in alveolar type II cells but not in  
393 Clara cells of rat lung. *Am. J. Respir. Cell Mol. Biol.* 6, 594–600.
- 394 Katzen, J., and Beers, M.F. (2020). Contributions of alveolar epithelial cell quality control to pulmonary fibrosis. *J. Clin.*  
395 *Invest.* 130, 5088–5099.
- 396 Kim, T.H., Kim, S.-H., Seo, J.-Y., Chung, H., Kwak, H.J., Lee, S.-K., Yoon, H.J., Shin, D.H., Park, S.S., and Sohn, J.W.  
397 (2011). Blockade of the Wnt/ $\beta$ -catenin pathway attenuates bleomycin-induced pulmonary fibrosis. *Tohoku J. Exp. Med.*  
398 223, 45–54.
- 399 Kimura, M., Stone, R.C., Hunt, S.C., Skurnick, J., Lu, X., Cao, X., Harley, C.B., and Aviv, A. (2010). Measurement of  
400 telomere length by the Southern blot analysis of terminal restriction fragment lengths. *Nat. Protoc.* 5, 1596–1607.
- 401 King, T.E., Jr, Bradford, W.Z., Castro-Bernardini, S., Fagan, E.A., Glaspole, I., Glassberg, M.K., Gorina, E., Hopkins,  
402 P.M., Kardatzke, D., Lancaster, L., et al. (2014). A phase 3 trial of pirfenidone in patients with idiopathic pulmonary  
403 fibrosis. *N. Engl. J. Med.* 370, 2083–2092.
- 404 Kneidinger, N., Yildirim, A.Ö., Callegari, J., Takenaka, S., Stein, M.M., Dumitrescu, R., Bohla, A., Bracke, K.R., Morty,  
405 R.E., Brusselle, G.G., et al. (2011). Activation of the WNT/ $\beta$ -catenin pathway attenuates experimental emphysema. *Am. J.*  
406 *Respir. Crit. Care Med.* 183, 723–733.
- 407 Kobayashi, Y., Tata, A., Konkimalla, A., Katsura, H., Lee, R.F., Ou, J., Banovich, N.E., Kropski, J.A., and Tata, P.R.  
408 (2020). Persistence of a regeneration-associated, transitional alveolar epithelial cell state in pulmonary fibrosis. *Nat. Cell*  
409 *Biol.* 1–13.
- 410 Königshoff, M., Balsara, N., Pfaff, E.-M., Kramer, M., Chrobak, I., Seeger, W., and Eickelberg, O. (2008). Functional Wnt  
411 signaling is increased in idiopathic pulmonary fibrosis. *PLoS One* 3, e2142.
- 412 Königshoff, M., Kramer, M., Balsara, N., Wilhelm, J., Amarie, O.V., Jahn, A., Rose, F., Fink, L., Seeger, W., Schaefer, L.,  
413 et al. (2009). WNT1-inducible signaling protein-1 mediates pulmonary fibrosis in mice and is upregulated in humans with  
414 idiopathic pulmonary fibrosis. *J. Clin. Invest.* 119, 772–787.
- 415 Krämer, A., Green, J., Pollard, J., Jr, and Tugendreich, S. (2014). Causal analysis approaches in Ingenuity Pathway  
416 Analysis. *Bioinformatics* 30, 523–530.
- 417 Kropski, J.A., Pritchett, J.M., Zoz, D.F., Crossno, P.F., Markin, C., Garnett, E.T., Degryse, A.L., Mitchell, D.B., Polosukhin,  
418 V.V., Rickman, O.B., et al. (2015). Extensive phenotyping of individuals at risk for familial interstitial pneumonia reveals  
419 clues to the pathogenesis of interstitial lung disease. *Am. J. Respir. Crit. Care Med.* 191, 417–426.
- 420 Kropski, J.A., Reiss, S., Markin, C., Brown, K.K., Schwartz, D.A., Schwarz, M.I., Loyd, J.E., Phillips, J.A., 3rd, Blackwell,  
421 T.S., and Cogan, J.D. (2017). Rare Genetic Variants in PARN Are Associated with Pulmonary Fibrosis in Families. *Am. J.*  
422 *Respir. Crit. Care Med.* 196, 1481–1484.
- 423 Lai, T.-P., Wright, W.E., and Shay, J.W. (2016). Generation of digoxigenin-incorporated probes to enhance DNA detection  
424 sensitivity. *Biotechniques* 60, 306–309.
- 425 Lai, T.-P., Zhang, N., Noh, J., Mender, I., Tedone, E., Huang, E., Wright, W.E., Danuser, G., and Shay, J.W. (2017). A  
426 method for measuring the distribution of the shortest telomeres in cells and tissues. *Nat. Commun.* 8, 1356.
- 427 Lawson, W.E., Crossno, P.F., Polosukhin, V.V., Roldan, J., Cheng, D.-S., Lane, K.B., Blackwell, T.R., Xu, C., Markin, C.,  
428 Ware, L.B., et al. (2008). Endoplasmic reticulum stress in alveolar epithelial cells is prominent in IPF: association with  
429 altered surfactant protein processing and herpesvirus infection. *Am. J. Physiol. Lung Cell. Mol. Physiol.* 294, L1119–  
430 L1126.
- 431 Lederer, D.J., and Martinez, F.J. (2018). Idiopathic Pulmonary Fibrosis. *N. Engl. J. Med.* 378, 1811–1823.
- 432 Lee, J., Reddy, R., Barsky, L., Scholes, J., Chen, H., Shi, W., and Driscoll, B. (2009). Lung alveolar integrity is  
433 compromised by telomere shortening in telomerase-null mice. *Am. J. Physiol. Lung Cell. Mol. Physiol.* 296, L57–L70.



- 434 Li, C., Xiao, J., Hormi, K., Borok, Z., and Minoo, P. (2002). Wnt5a participates in distal lung morphogenesis. *Dev. Biol.*  
435 *248*, 68–81.
- 436 Li, C., Hu, L., Xiao, J., Chen, H., Li, J.T., Bellusci, S., Delanghe, S., and Minoo, P. (2005). Wnt5a regulates Shh and Fgf10  
437 signaling during lung development. *Dev. Biol.* *287*, 86–97.
- 438 Liberzon, A., Subramanian, A., Pinchback, R., Thorvaldsdóttir, H., Tamayo, P., and Mesirov, J.P. (2011). Molecular  
439 signatures database (MSigDB) 3.0. *Bioinformatics* *27*, 1739–1740.
- 440 Liberzon, A., Birger, C., Thorvaldsdóttir, H., Ghandi, M., Mesirov, J.P., and Tamayo, P. (2015). The Molecular Signatures  
441 Database (MSigDB) hallmark gene set collection. *Cell Syst* *1*, 417–425.
- 442 Love, M.I., Huber, W., and Anders, S. (2014). Moderated estimation of fold change and dispersion for RNA-seq data with  
443 DESeq2. *Genome Biol.* *15*, 550.
- 444 Maitra, M., Wang, Y., Gerard, R.D., Mendelson, C.R., and Garcia, C.K. (2010). Surfactant protein A2 mutations  
445 associated with pulmonary fibrosis lead to protein instability and endoplasmic reticulum stress. *J. Biol. Chem.* *285*, 22103–  
446 22113.
- 447 Maretto, S., Cordenonsi, M., Dupont, S., Braghetta, P., Broccoli, V., Hassan, A.B., Volpin, D., Bressan, G.M., and Piccolo,  
448 S. (2003). Mapping Wnt/ $\beta$ -catenin signaling during mouse development and in colorectal tumors. *Proc. Natl. Acad. Sci. U.*  
449 *S. A.* *100*, 3299–3304.
- 450 McDonough, J.E., Ahangari, F., Li, Q., Jain, S., Verleden, S.E., Herazo-Maya, J., Vukmirovic, M., Deluliis, G.,  
451 Tzouveleakis, A., Tanabe, N., et al. (2019). Transcriptional regulatory model of fibrosis progression in the human lung. *JCI*  
452 *Insight* *4*.
- 453 Mikels, A.J., and Nusse, R. (2006). Purified Wnt5a protein activates or inhibits beta-catenin-TCF signaling depending on  
454 receptor context. *PLoS Biol.* *4*, e115.
- 455 Mulugeta, S., Nguyen, V., Russo, S.J., Muniswamy, M., and Beers, M.F. (2005). A surfactant protein C precursor protein  
456 BRICHOS domain mutation causes endoplasmic reticulum stress, proteasome dysfunction, and caspase 3 activation. *Am.*  
457 *J. Respir. Cell Mol. Biol.* *32*, 521–530.
- 458 Nabhan, A.N., Brownfield, D.G., Harbury, P.B., Krasnow, M.A., and Desai, T.J. (2018). Single-cell Wnt signaling niches  
459 maintain stemness of alveolar type 2 cells. *Science* *359*, 1118–1123.
- 460 Naikawadi, R.P., Disayabutr, S., Mallavia, B., Donne, M.L., Green, G., La, J.L., Rock, J.R., Looney, M.R., and Wolters,  
461 P.J. (2016). Telomere dysfunction in alveolar epithelial cells causes lung remodeling and fibrosis. *JCI Insight* *1*, e86704.
- 462 Nureki, S.-I., Tomer, Y., Venosa, A., Katzen, J., Russo, S.J., Jamil, S., Barrett, M., Nguyen, V., Kopp, M., Mulugeta, S., et  
463 al. (2018). Expression of mutant Sftpc in murine alveolar epithelia drives spontaneous lung fibrosis. *J. Clin. Invest.* *128*,  
464 4008–4024.
- 465 Okubo, T., and Hogan, B.L.M. (2004). Hyperactive Wnt signaling changes the developmental potential of embryonic lung  
466 endoderm. *J. Biol.* *3*, 11.
- 467 Ostrin, E.J., Little, D.R., Gerner-Mauro, K.N., Sumner, E.A., Ríos-Corzo, R., Ambrosio, E., Holt, S.E., Forcioli-Conti, N.,  
468 Akiyama, H., Hanash, S.M., et al. (2018).  $\beta$ -Catenin maintains lung epithelial progenitors after lung specification.  
469 *Development* *145*.
- 470 Passos, J.F., Saretzki, G., Ahmed, S., Nelson, G., Richter, T., Peters, H., Wappler, I., Birket, M.J., Harold, G., Schaeuble,  
471 K., et al. (2007). Mitochondrial dysfunction accounts for the stochastic heterogeneity in telomere-dependent senescence.  
472 *PLoS Biol.* *5*, e110.
- 473 Patro, R., Duggal, G., Love, M.I., Irizarry, R.A., and Kingsford, C. (2017). Salmon provides fast and bias-aware  
474 quantification of transcript expression. *Nat. Methods* *14*, 417–419.
- 475 Pluquet, O., Pourtier, A., and Abbadie, C. (2015). The unfolded protein response and cellular senescence. A review in the  
476 theme: cellular mechanisms of endoplasmic reticulum stress signaling in health and disease. *Am. J. Physiol. Cell Physiol.*  
477 *308*, C415–C425.



- 478 Povedano, J.M., Martinez, P., Flores, J.M., Mulero, F., and Blasco, M.A. (2015). Mice with Pulmonary Fibrosis Driven by  
479 Telomere Dysfunction. *Cell Rep.* *12*, 286–299.
- 480 Qian, W., Kumar, N., Roginskaya, V., Fouquerel, E., Opresko, P.L., Shiva, S., Watkins, S.C., Kolodieznyi, D., Bruchez,  
481 M.P., and Van Houten, B. (2019). Chemoptogenetic damage to mitochondria causes rapid telomere dysfunction. *Proc.*  
482 *Natl. Acad. Sci. U. S. A.* *116*, 18435–18444.
- 483 Richeldi, L., du Bois, R.M., Raghu, G., Azuma, A., Brown, K.K., Costabel, U., Cottin, V., Flaherty, K.R., Hansell, D.M.,  
484 Inoue, Y., et al. (2014). Efficacy and safety of nintedanib in idiopathic pulmonary fibrosis. *N. Engl. J. Med.* *370*, 2071–  
485 2082.
- 486 RStudio Team (2020). RStudio: Integrated Development Environment for R (Boston, MA: RStudio, PBC.).
- 487 Sahin, E., Colla, S., Liesa, M., Moslehi, J., Müller, F.L., Guo, M., Cooper, M., Kotton, D., Fabian, A.J., Walkey, C., et al.  
488 (2011). Telomere dysfunction induces metabolic and mitochondrial compromise. *Nature* *470*, 359–365.
- 489 Shetty, S.K., Tiwari, N., Marudamuthu, A.S., Puthusseri, B., Bhandary, Y.P., Fu, J., Levin, J., Idell, S., and Shetty, S.  
490 (2017). p53 and miR-34a Feedback Promotes Lung Epithelial Injury and Pulmonary Fibrosis. *Am. J. Pathol.* *187*, 1016–  
491 1034.
- 492 Shu, W., Guttentag, S., Wang, Z., Andl, T., Ballard, P., Lu, M.M., Piccolo, S., Birchmeier, W., Whitsett, J.A., Millar, S.E., et  
493 al. (2005). Wnt/beta-catenin signaling acts upstream of N-myc, BMP4, and FGF signaling to regulate proximal-distal  
494 patterning in the lung. *Dev. Biol.* *283*, 226–239.
- 495 Snetselaar, R., van Batenburg, A.A., van Oosterhout, M.F.M., Kazemier, K.M., Roothaan, S.M., Peeters, T., van der Vis,  
496 J.J., Goldschmeding, R., Grutters, J.C., and van Moorsel, C.H.M. (2017). Short telomere length in IPF lung associates  
497 with fibrotic lesions and predicts survival. *PLoS One* *12*, e0189467.
- 498 Strunz, M., Simon, L.M., Ansari, M., Kathiriya, J.J., Angelidis, I., Mayr, C.H., Tsidiridis, G., Lange, M., Mattner, L.F., Yee,  
499 M., et al. (2020). Alveolar regeneration through a Krt8+ transitional stem cell state that persists in human lung fibrosis.  
500 *Nat. Commun.* *11*, 3559.
- 501 Subramanian, A., Tamayo, P., Mootha, V.K., Mukherjee, S., Ebert, B.L., Gillette, M.A., Paulovich, A., Pomeroy, S.L.,  
502 Golub, T.R., Lander, E.S., et al. (2005). Gene set enrichment analysis: a knowledge-based approach for interpreting  
503 genome-wide expression profiles. *Proc. Natl. Acad. Sci. U. S. A.* *102*, 15545–15550.
- 504 Suram, A., Kaplunov, J., Patel, P.L., Ruan, H., Cerutti, A., Boccardi, V., Fumagalli, M., Di Micco, R., Mirani, N., Gurung,  
505 R.L., et al. (2012). Oncogene-induced telomere dysfunction enforces cellular senescence in human cancer precursor  
506 lesions. *EMBO J.* *31*, 2839–2851.
- 507 Takai, H., Smogorzewska, A., and de Lange, T. (2003). DNA damage foci at dysfunctional telomeres. *Curr. Biol.* *13*,  
508 1549–1556.
- 509 Tanjore, H., Degryse, A.L., Crossno, P.F., Xu, X.C., McConaha, M.E., Jones, B.R., Polosukhin, V.V., Bryant, A.J., Cheng,  
510 D.-S., Newcomb, D.C., et al. (2013).  $\beta$ -catenin in the alveolar epithelium protects from lung fibrosis after intratracheal  
511 bleomycin. *Am. J. Respir. Crit. Care Med.* *187*, 630–639.
- 512 Team, R Core (2020). R: A language and environment for statistical computing (Vienna, Austria: R Foundation for  
513 Statistical Computing).
- 514 Telomeres Mendelian Randomization Collaboration, Haycock, P.C., Burgess, S., Nounu, A., Zheng, J., Okoli, G.N.,  
515 Bowden, J., Wade, K.H., Timpson, N.J., Evans, D.M., et al. (2017). Association Between Telomere Length and Risk of  
516 Cancer and Non-Neoplastic Diseases: A Mendelian Randomization Study. *JAMA Oncol* *3*, 636–651.
- 517 Thomas, A.Q., Lane, K., Phillips, J., 3rd, Prince, M., Markin, C., Speer, M., Schwartz, D.A., Gaddipati, R., Marney, A.,  
518 Johnson, J., et al. (2002). Heterozygosity for a surfactant protein C gene mutation associated with usual interstitial  
519 pneumonitis and cellular nonspecific interstitial pneumonitis in one kindred. *Am. J. Respir. Crit. Care Med.* *165*, 1322–  
520 1328.
- 521 Uhl, F.E., Vierkotten, S., Wagner, D.E., Burgstaller, G., Costa, R., Koch, I., Lindner, M., Meiners, S., Eickelberg, O., and  
522 Königshoff, M. (2015). Preclinical validation and imaging of Wnt-induced repair in human 3D lung tissue cultures. *Eur.*  
523 *Respir. J.* *46*, 1150–1166.

- 524 Uphoff, C.C., and Drexler, H.G. (2014). Detection of Mycoplasma contamination in cell cultures. *Curr. Protoc. Mol. Biol.*  
525 *106*, 28.4.1–14.
- 526 Valapour, M., Lehr, C.J., Skeans, M.A., Smith, J.M., Uccellini, K., Goff, R., Foutz, J., Israni, A.K., Snyder, J.J., and  
527 Kasiske, B.L. (2020). OPTN/SRTR 2018 Annual Data Report: Lung. *Am. J. Transplant* *20 Suppl s1*, 427–508.
- 528 Wang, X.M., Zhang, Y., Kim, H.P., Zhou, Z., Feghali-Bostwick, C.A., Liu, F., Ifedigbo, E., Xu, X., Oury, T.D., Kaminski, N.,  
529 et al. (2006). Caveolin-1: a critical regulator of lung fibrosis in idiopathic pulmonary fibrosis. *J. Exp. Med.* *203*, 2895–2906.
- 530 Wang, Y., Kuan, P.J., Xing, C., Cronkhite, J.T., Torres, F., Rosenblatt, R.L., DiMaio, J.M., Kinch, L.N., Grishin, N.V., and  
531 Garcia, C.K. (2009). Genetic defects in surfactant protein A2 are associated with pulmonary fibrosis and lung cancer. *Am.*  
532 *J. Hum. Genet.* *84*, 52–59.
- 533 Wickham, H., Averick, M., Bryan, J., Chang, W., McGowan, L., François, R., Grolemund, G., Hayes, A., Henry, L., Hester,  
534 J., et al. (2019). Welcome to the Tidyverse. *JOSS* *4*, 1686.
- 535 Wiese, K.E., Nusse, R., and van Amerongen, R. (2018). Wnt signalling: conquering complexity. *Development* *145*.
- 536 Woo, D.-H., Chen, Q., Yang, T.-L.B., Glineburg, M.R., Hoge, C., Leu, N.A., Johnson, F.B., and Lengner, C.J. (2016).  
537 Enhancing a Wnt-Telomere Feedback Loop Restores Intestinal Stem Cell Function in a Human Organotypic Model of  
538 Dyskeratosis Congenita. *Cell Stem Cell* *19*, 397–405.
- 539 Yang, T.-L.B., Chen, Q., Deng, J.T., Jagannathan, G., Tobias, J.W., Schultz, D.C., Wang, S., Lengner, C.J., Rustgi, A.K.,  
540 Lynch, J.P., et al. (2017). Mutual reinforcement between telomere capping and canonical Wnt signalling in the intestinal  
541 stem cell niche. *Nat. Commun.* *8*, 14766.
- 542 Yao, C., Guan, X., Carraro, G., Parimon, T., Liu, X., Huang, G., Mulay, A., Soukiasian, H.J., David, G., Weigt, S.S., et al.  
543 (2020). Senescence of Alveolar Type 2 Cells Drives Progressive Pulmonary Fibrosis. *Am. J. Respir. Crit. Care Med.*
- 544 Yihui Xie, J.C.A.X.T. (2020). DT: A Wrapper of the JavaScript Library “DataTables.”
- 545 Yu, G. (2020). enrichplot: Visualization of Functional Enrichment Result.
- 546 Yu, G., Wang, L.-G., Han, Y., and He, Q.-Y. (2012). clusterProfiler: an R package for comparing biological themes among  
547 gene clusters. *OMICS* *16*, 284–287.
- 548 Yu, G., Tzouveleakis, A., Wang, R., Herazo-Maya, J.D., Ibarra, G.H., Srivastava, A., de Castro, J.P.W., Deluiliis, G.,  
549 Ahangari, F., Woolard, T., et al. (2018). Thyroid hormone inhibits lung fibrosis in mice by improving epithelial  
550 mitochondrial function. *Nat. Med.* *24*, 39–49.
- 551 Zacharias, W.J., Frank, D.B., Zepp, J.A., Morley, M.P., Alkhaleel, F.A., Kong, J., Zhou, S., Cantu, E., and Morrissey, E.E.  
552 (2018). Regeneration of the lung alveolus by an evolutionarily conserved epithelial progenitor. *Nature* *555*, 251–255.
- 553 Zhang, Y., Toh, L., Lau, P., and Wang, X. (2012). Human telomerase reverse transcriptase (hTERT) is a novel target of  
554 the Wnt/ $\beta$ -catenin pathway in human cancer. *J. Biol. Chem.* *287*, 32494–32511.

555

556

## 557 **Experimental Procedures**

### 558 **iPSc Line Generation and Maintenance**

559 The patient derived AG04646 *DKC1 A386T* line was obtained from our previous studies (Woo et al.,  
560 2016). The BU3 *NKX2.1::GFP SFTPC::TdTomato* line was a generous gift from Dr. Darrell Kotton at  
561 Boston University. iPS cells used for differentiation were maintained on growth factor reduced  
562 Matrigel (Corning) coated plates in StemMACS™ iPS-Brew XF medium (Miltenyi Biotec). Cells were  
563 cultured in clusters and passaged every 4-5 days using StemMACS Dissociation reagent (Miltenyi  
564 Biotec). All iPS lines were genotyped using an RFLP at the relevant important loci and the sequence  
565 was confirmed by Sanger sequencing. All cells were routinely screened for mycoplasma  
566 contamination using a PCR based assay (Uphoff and Drexler, 2014).

567

### 568 **CRISPR Editing for generating Paired *DKC1* Mutant Cell Lines in BU3 NGST**

569 To generate the introduced BU3 NGST line harboring the *DKC1* mutation, we used the CRISPR track  
570 on the UCSC genome browser to select candidate guideRNAs (gRNAs) that targeted as close to the  
571 individual mutation as possible, had easily mutable PAM sites and would introduce a new restriction  
572 site to make screening easier (see the Key Resources Table for exact sequences and Figure S1 for  
573 details). gRNAs were ordered as oligos from IDT and cloned into pX458, a gift from Dr. Feng Zhang's  
574 lab (Addgene # 48138). The candidate guides were tested for cutting efficiency by transfecting them  
575 into HEK293T cells and assaying cutting efficiency using T7E1 digestion of the PCR amplified locus.  
576 The most efficient guides were chosen and ssODN HDR templates were designed to eliminate the  
577 PAM. iPS cells were then nucleofected with the Amaxa Nucleofection system using the following  
578 program (P3, CA-137) (Lonza). The cells were allowed to recover for 36-48 hours at high density in  
579 the presence of ROCK inhibitor and then isolated by FACS for GFP<sup>hi</sup> cells. They were plated at low  
580 density (2500 cells/10 cm plate) and allowed to form single colonies. After seven to ten days,  
581 individual clones were selected and transferred to 96 well plates, and screened for introduction of the  
582 restriction site for each mutation. Restriction enzyme positive clones were expanded and then  
583 subjected to sanger sequencing for identification of correctly edited clones. Successfully edited

584 clones were checked for normal karyotype by G-banding (Cell Line Genetics), mycoplasma  
585 contamination, and pluripotency marker expression by immunofluorescence, and were subsequently  
586 passaged for at least 5 passages before being re-genotyped to ensure that the clones were not  
587 mixed. During differentiations, all iAT2 cells were genotyped by restriction digest to ensure that the  
588 mutation was not lost with passage.

589

590 **Directed differentiation into NKX2.1+ lung progenitors and SFTPC+ iPS-derived AT2 cells**

591 A modified version of the protocol described in (Jacob et al., 2017) was used to generate SFTPC

592 expressing iAT2 cells. In brief, iPS cells were seeded at 500,000 cells per well on a 6-well plate with  
593 ROCK inhibitor for 24 hours and incubated at 5% O<sub>2</sub> | 5% CO<sub>2</sub> | 90% N<sub>2</sub>. Definitive endoderm was  
594 induced using the StemDiff Definitive Endoderm kit for 3 days. Next, the cells were split at a ratio of  
595 1:3 onto fresh Matrigel plates and anteriorized using dorsomorphin (2 μM) and SB431542 (10 μM) in  
596 complete Serum Free Differentiation Media (cSFDM) for three days. Cells were then differentiated  
597 into NKX2.1+ progenitors by incubating in CBRa media (cSFDM containing CHIR99021 (3 μM),  
598 BMP4 (10 ng/mL), and retinoic acid (100 nM)) for 7 days changing media every 2 days at first and  
599 then increasing to every day media changes when the media became more acidic. On day 15 or 16,  
600 *NKX2.1*+ progenitors were isolated using a FACSJazz sorter using the endogenous *NKX2.1::GFP*  
601 reporter.

602

603 *NKX2.1*+ sorted cells were replated at a density of 400,000 cells/mL in 90% Matrigel supplemented  
604 with 10% of CK+DCI+TZV media (cSFDM containing 3 μM CHIR99021, 10 ng/mL KGF, 100 nM  
605 dexamethasone, 100μM 8Br-cAMP and 100 μM IBMX and 2 μM TZV) (from now on referred to as  
606 90/10 Matrigel). The Matrigel droplets were allowed to cure at 37 °C for 20-30 minutes and then  
607 overlaid with an appropriate amount of CK+DCI+TZV Media. These alveolosphere containing matrigel  
608 droplets were incubated at 37°C at 20% O<sub>2</sub> | 5% CO<sub>2</sub> | 75% N<sub>2</sub> (room air) for 14 days changing with  
609 fresh media every other day. On Day 28, the iAT2 containing alveolospheres were sorted on a

610 FACSJazz sorter for SFTPC+ cells using the endogenous SFTPC::TdTomato reporter. These sorted  
611 SFTPC+ cells were replated at a concentration of 65,000 cells / mL in 90/10 Matrigel drops and  
612 grown in K+DCI+TZV at 37°C in an ambient air incubator supplemented to 5% CO<sub>2</sub> for 3 weeks  
613 changing media every other day.

614

#### 615 **Alveolosphere Counting and Formation Efficiency Calculations**

616 Alveolosphere images were taken on a Leica Thunder widefield microscope using a 1.25x objective.

617 Z-stacks were maximum projected and then thresholded using ImageJ to create a binary file. Binary

618 files were eroded and dilated to ensure maximum determination of the alveolosphere size. Finally the

619 binary images were separated by watershedding and alveolospheres were counted using Analyze

620 Particles in ImageJ.

#### 621 **Immunofluorescence Microscopy of iAT2 alveolospheres**

622 Alveolospheres were washed with PBS and then fixed in place using 2% PFA at room temperature at

623 room temperature for 30 minutes and then dehydrated and paraffin embedded and sectioned. Once

624 cut, slides were de-paraffinized, rehydrated, permeabilized, and antigens were retrieved by steaming

625 for 15 minutes in a citrate buffer (Vector Labs). After blocking, each slide was incubated with a

626 primary antibody using the concentrations listed in the Key Resource Table. Slides were incubated

627 with primary antibody at 37 °C for two hours. After washing, slides were incubated with appropriate

628 fluorochrome conjugated secondary antibodies (see Key Resources Table for antibody details).

629 Slides were then washed, counterstained with DAPI, and mounted. Images were acquired using a

630 Leica Thunder Widefield Microscope.

631

632 TIFs were stained as described in (Suram et al., 2012). In brief, cut slides were de-paraffinized,

633 rehydrated, permeabilized and antigens were retrieved as for other immunofluorescence stains. Slides

634 were blocked and stained for 53BP1 and then stained with an appropriate fluorochrome conjugated

635 secondary antibody. Slides were then re-fixed with paraformaldehyde, quenched with glycine, re-

636 dehydrated in an ethanol series, and air dried. The slides were then stained with the PNA probe. The

637 slides were washed, rehydrated in an ethanol series, and stained with a tertiary fluorochrome  
638 conjugated antibody. Slides were then washed, counterstained with DAPI, and mounted. TIF images  
639 were acquired using a Leica SP8 Confocal microscope. Quantification of nuclei was carried out in  
640 ImageJ in a blinded fashion.

641  
642 **Measurement of Telomerase Activity with TRAP**

643 iPS cells or iAT2 cells were cultured as indicated in each figure legend. 100,000 cells were harvested  
644 using methods described and lysed using NP-40 lysis buffer and processed as described in (Herbert  
645 et al., 2006). In brief, lysates were incubated with a telomerase substrate and incubated at 30°C for  
646 telomerase to add telomere repeats. The reactions were then PCR amplified. Telomere repeats were  
647 resolved on a 4-20% TBE polyacrylamide gel and visualized by staining with SYBR Green nucleic  
648 acid gel stain. Relative telomerase activity was quantified using ImageJ focusing on the first six  
649 amplicons averaged across the dilutions.

650  
651 **Measurement of Telomere Lengths by TRF and TeSLA**

652 Telomere lengths were measured as described in (Lai et al., 2016, 2017). DNA was isolated from  
653 cells using a Gentra Puregene kit (Qiagen). DNA was quantified by fluorometry using QuBit 2.0  
654 (Invitrogen). For TRF analysis in brief, 500 ng of DNA was digested with CviAll overnight followed by  
655 digestion with a mixture of Bfal, Msel, and Ndel overnight. For TeSLA in brief, 50 ng of DNA was  
656 ligated to telorette adapters, then digested with CviAll, then digested with a combination of Bfal, Msel  
657 and Ndel, dephosphorylated, and TeSLA adapters (AT/TA Adapters) were ligated on. These TeSLA  
658 libraries were PCR amplified using Lucigen's FailSafe polymerase kit with Pre-Mix H.

659  
660 Southern blotting was carried out using previously established protocols with some modification  
661 (Kimura et al., 2010; Lai et al., 2017). TRFs and TeSLA PCR reactions were separated on a 0.7%  
662 agarose gel at 0.833 V/cm for 24 hours. The gel was depurinated and denatured and then transferred  
663 to a Hybond XL membrane (Cytiva) by capillary transfer using denaturation buffer. The Hybond  
664 membrane was hybridized using a DIG-labeled telomere probe overnight. The blot was then washed



665 and exposed using CDP-Star on an LAS-4000 Image Quant imager (Cytiva). TRFs were analyzed  
666 using ImageQuant while TeSLAs were analyzed using the MatLab software developed previously (Lai  
667 et al., 2017).

#### 668 **Measurement of Telomere Lengths by qPCR**

669 Average telomere length was measured by qPCR as described in (Cawthon, 2002; Joglekar et al.,  
670 2020) with some modifications. In brief, isolated genomic DNA was quantified by QuBit fluorometry  
671 (Invitrogen) and diluted to within the range of a standard curve constructed from a mixture of all  
672 samples analyzed. Triplicate qPCR reactions of the Telomeric (T) product and the Single copy gene  
673 (S) (*HBB*) were amplified using a Roche LightCycler 480 II (Roche) using the following programs: T  
674 PCR Program 95°C for 10 minutes, 40 cycles of 95°C for 15 seconds, 56°C for 1 minute; S PCR  
675 Program 95°C for 10 minutes, 40 cycles of 95°C for 15 seconds, 58°C for 1 minute. Cq values were  
676 computed using the second derivative method, and T/S ratios were calculated using the  $2^{-\Delta\Delta Ct}$   
677 method.

#### 679 **RNA-Sequencing and Data Analysis**

680 SPC+ sorted cells from the indicated times during, counted and harvested in TRIzol and stored at -80  
681 °C until further processing. The RNA was isolated using a Direct-Zol kit (Zymo Research). RNA  
682 concentration was obtained by QuBit fluorometry (Invitrogen) and the integrity was checked by tape  
683 station analysis (Agilent Technologies). All samples had RINs >8, and the libraries were prepared by  
684 poly-A selection and sequenced by GeneWiz, LLC.

686 RNA sequencing libraries were prepared using the NEBNext Ultra RNA Library Prep Kit for Illumina  
687 following manufacturer's instructions (NEB). Briefly, mRNAs were first enriched with Oligo(dT) beads.  
688 Enriched mRNAs were fragmented for 15 minutes at 94 °C. First strand and second strand cDNAs  
689 were subsequently synthesized. cDNA fragments were end repaired and adenylated at 3'ends, and  
690 universal adapters were ligated to cDNA fragments, followed by index addition and library enrichment  
691



692 by limited-cycle PCR. The sequencing libraries were validated on the Agilent TapeStation (Agilent  
693 Technologies), and quantified using a Qubit 2.0 Fluorometer (Invitrogen) as well as by quantitative  
694 PCR (KAPA Biosystems).

695  
696 The sequencing libraries were pooled and clustered on one lane of a flowcell. After clustering, the  
697 flowcell was loaded on the Illumina HiSeq instrument (4000 or equivalent) according to  
698 manufacturer's instructions. The samples were sequenced using a 2x150bp paired end configuration.  
699 Image analysis and base calling were conducted by the HiSeq control software . Raw sequence data  
700 (.bcl files) generated from Illumina HiSeq was converted into fastq files and de-multiplexed using  
701 Illumina's bcl2fastq 2.17 software. One mismatch was allowed for index sequence identification.

702  
703 Fastq files were checked for quality using FastQC. Raw sequence files (fastq) for 22 samples were  
704 mapped using salmon (<https://combine-lab.github.io/salmon/>)(Patro et al., 2017) against the human  
705 transcripts described in Gencode (version v33, built on the human genome GRCm38,  
706 <https://www.gencodegenes.org>), with a 70.5% average mapping rate yielding 30.4M average total  
707 input reads per sample. Transcript counts were summarized to the gene level using tximport  
708 (<https://bioconductor.org/packages/release/bioc/html/tximport.html>), and normalized and tested for  
709 differential expression using DESeq2  
710 (<https://bioconductor.org/packages/release/bioc/html/DESeq2.html>). Subsets of time-matched  
711 samples were used to compute pair-wise contrast statistics for mutant vs. wt at each time.

712  
713 Gene set enrichment analysis (GSEA) (Subramanian et al., 2005) was carried out in R (v4.0.2)  
714 (Team, R Core, 2020) using RStudio (v1.3.1056) (RStudio Team, 2020), the tidyverse (v1.3.0)  
715 (Wickham et al., 2019), and the readxl package (v1.3.1) (Hadley Wickham, 2019). GSEA was run for  
716 contrasts of interest in pre-ranked mode using the DESeq2 statistic as the ranking metric(Love et al.,  
717 2014). Annotated molecular signatures from the Hallmark Collection (H), Curated Collection (C2), and

718 Regulatory Target Molecular Collection (C3) maintained by the Molecular Signatures Database were  
719 accessed in RStudio using the msigdb package (v7.1.1) (Dolgalev, 2020; Liberzon et al., 2011,  
720 2015). The clusterProfiler package (v3.17.1) was used to perform GSEA on the unfiltered, sorted  
721 gene lists (Yu et al., 2012). GSEA results were viewed using the DT package (v0.15) (Yihui Xie,  
722 2020). GSEA plots were generated using the enrichplot package (v1.9.1) (Yu, 2020).

723  
724 Genes that differed in expression >2 fold and were associated with an adjusted p-value < 0.05 from  
725 the D70 time point were also analyzed through the use of Ingenuity Pathway Analysis (Ingenuity®  
726 Systems, [www.ingenuity.com](http://www.ingenuity.com)) (Krämer et al., 2014) through the University of Pennsylvania Molecular  
727 Profiling Facility.

## 728 729 **Statistical Methods**

730 Statistical methods are outlined in each of the figure legends. Each replicate “n” represents an  
731 entirely separate differentiation from the pluripotent stem cell stage. Quantitative data is represented  
732 as the mean with error bars representing the standard error of the mean. Student’s t-tests (unpaired  
733 and two-tailed) were used for determining statistical significance for all comparisons unless otherwise  
734 noted.

## 735 736 **Acknowledgments**

737 We would like to thank Drs. Eric Witze, Peter Klein, Timothy Olson, Andrew Vaughan, Leo Cardenas,  
738 Aravind Sivakumar for fruitful discussions. We would like to thank Dr. Dong Hun Woo, Carla Hoge,  
739 John McCormick and Dr. Rachel Truitt for help culturing iPS cells, and Dr. Darrell Kotton for providing  
740 the BU3 NGST line. This work was supported by NIH grants R01HL148821 (F.B.J. and C.J.L.),  
741 R21AG054209 (F.B.J. and C.J.L.) and 5T32AG000255 (R.J.F.), and a grant from Team Telomere  
742 and the Penn Orphan Disease Center. This work was also supported in part by the National Institute  
743 of Diabetes and Digestive and Kidney Diseases (NIDDK) Center for Molecular Studies in Digestive  
744 and Liver Diseases (P30DK050306) and its Molecular Profiling and Imaging core facilities, by the  
745 University of Pennsylvania induced Pluripotent Stem Cell Core and the Penn Genomic Analysis Core,

746 by the Flow Cytometry Core Laboratory and the Human Pluripotent Stem Cell Core at the Children's  
747 Hospital of Philadelphia Research Institute.

748

### 749 **Author Contributions**

750 Conceptualization, R.J.F., C.J.L., and F.B.J.; Methodology, R.J.F., Z.J.G.G., K.S., W.Y., E.E.M.,  
751 D.C.L., J.W.T., A.B., M.P.M., and F.B.J.; Investigation, R.J.F., Z.J.G.G., G.T.S., J.V.P., Q.C., S.R.,  
752 R.B., K.N.E., C.J.L., and F.B.J.; Writing – Original Draft, R.J.F. and F.B.J.; Writing – Review &  
753 Editing, R.J.F., D.C.L., C.J.L. and F.B.J.; Funding Acquisition, C.J.L. and F.B.J.; Resources, W.Y.,  
754 E.E.M., D.B.F., C.J.L. and F.B.J.; Supervision, F.B.J. and C.J.L.

755

### 756 **Declaration of Interests**

757 No competing interests to declare.

758

759

760 **Figures**

**A**

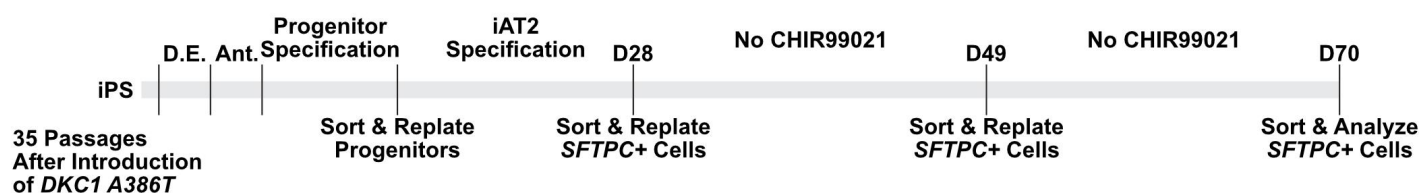

**B**

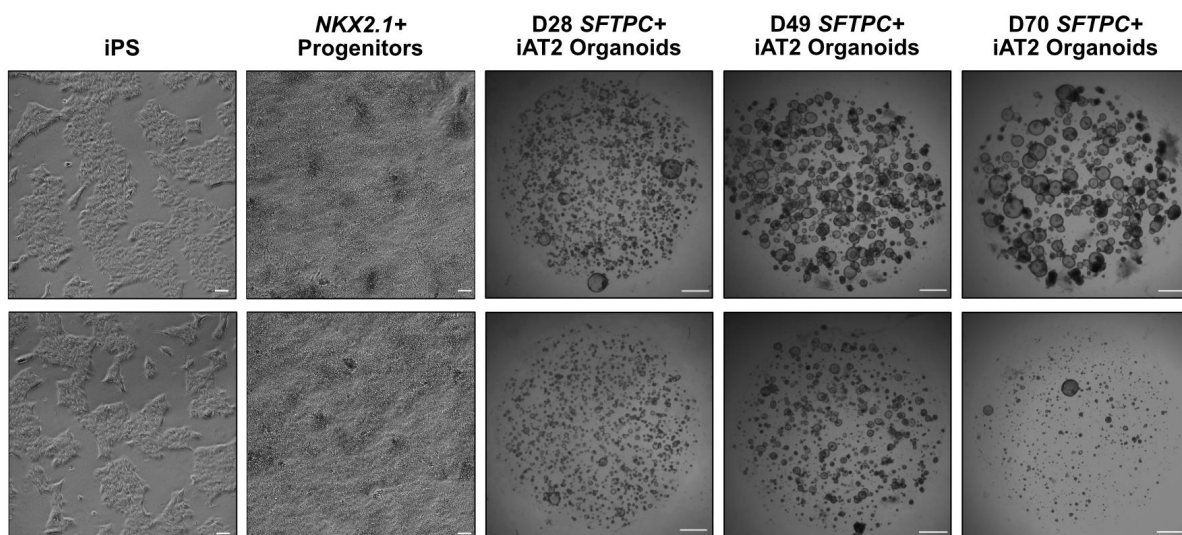

**C**

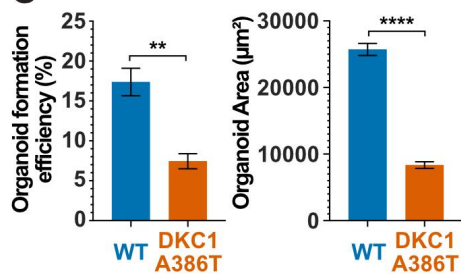

**D**

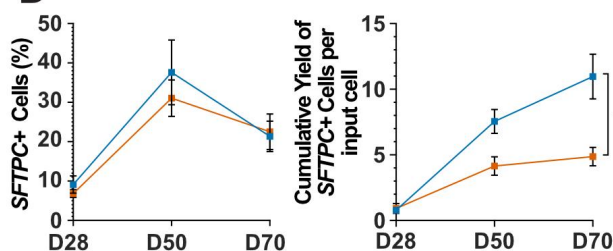

**E**

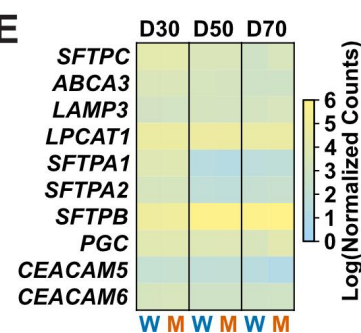

761

762

**Figure 1. DC iAT2s fail to form alveolospheres with successive passaging**

763

(A) Differentiation protocol used to probe the effects of the *DKC1 A386T* mutation on iAT2 cells. (D.E. - Definitive Endoderm Specification; Ant. - Anteriorization)

764

(B) Representative images of differentiating WT and *DKC1 A386T* mutant bearing iAT2 alveolospheres.

765

(scale bars, 100 µm as indicated for iPS and *NKX2.1*+ progenitors; 1 mm for all alveolosphere images)

766

(C) Quantifications of alveolosphere area and formation efficiency on D70. (n = 4; \*\* p < 0.01, \*\*\*\* p < 0.0001, Student's t-test)

767

768

(D) Quantification of the percentage *SFTPC*+ cells and the number of *SFTPC*+ cells produced with

769

passage of the iAT2 cells shows *DKC1 A386T* iAT2 alveolospheres accumulate fewer *SFTPC*+ cells. (n = 4; \*\* p < 0.01, Student's t-test)

770

771

(E) RNAseq of sorted *SFTPC*+ iAT2 cells at different passages show AT2 cell genes are not grossly affected by the *DKC1 A386T* mutation. (n = 4). W = wild type, M = mutant.

772

773

774

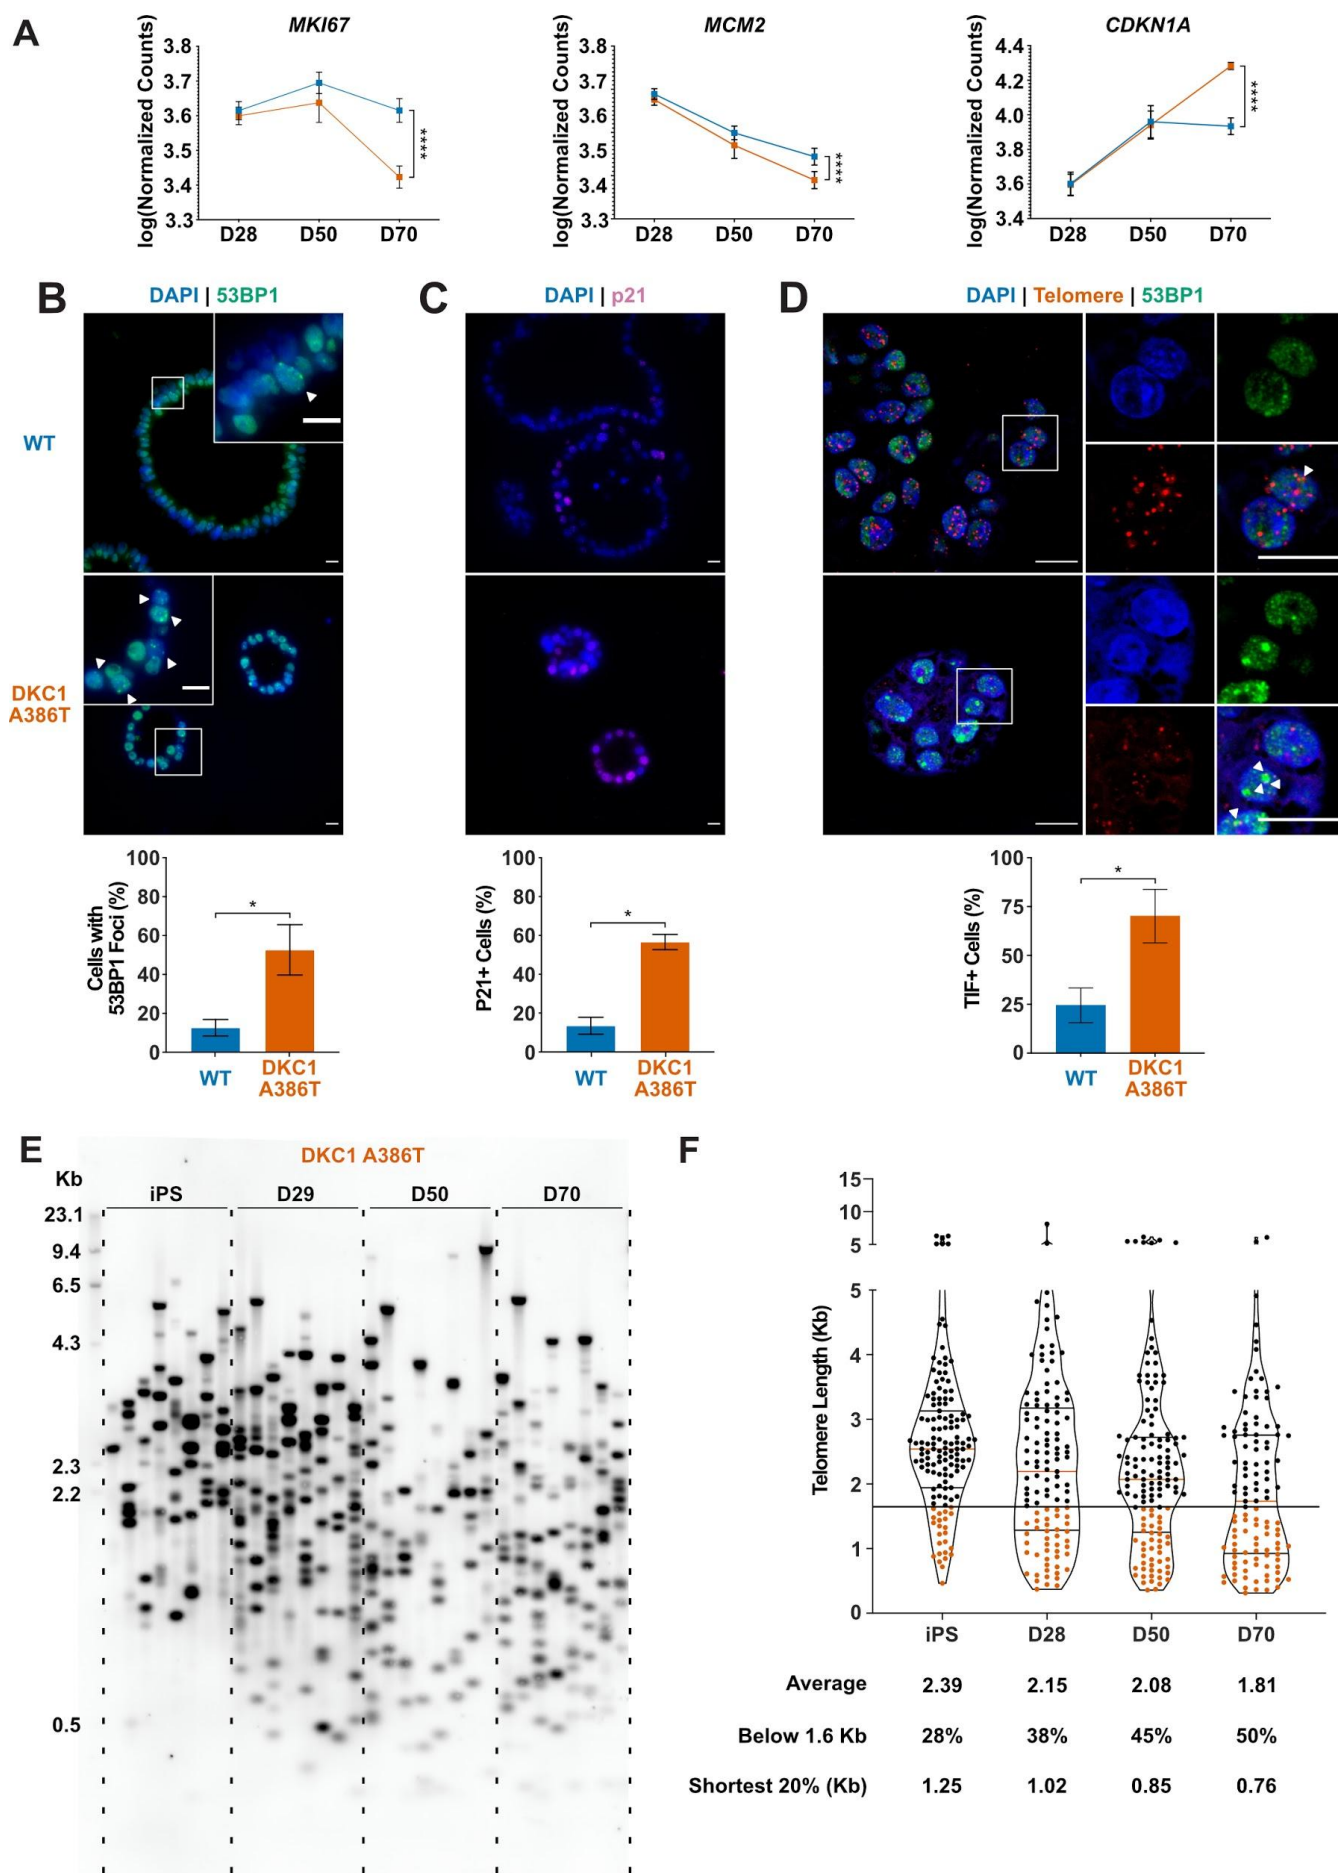



776 **Figure 2. DC iAT2s at D70 show hallmarks of senescence**

- 777 (A) Gene expression profiling of iAT2 cells at D28 and D50 show no difference between WT and *DKC1*  
778 *A386T* in expression of markers of proliferation and a cell cycle inhibitor, while at D70 cells, there is a  
779 significant decrease in *MCM2* and *MKI67* as well as a significant increase in *CDKN1A* (p21). (n = 4, \*\*\*\*  
780 p < 0.0001, DEseq2 pairwise contrast statistics)
- 781 (B) At D70, *DKC1 A386T* mutant iAT2 cells have a higher fraction of cells with 53BP1 foci. (n = 4, \* p <  
782 0.05, Student's t-Test; scale bars, 10  $\mu$ m; Insets highlight cells with 53BP1 foci as noted by the white  
783 arrowheads)
- 784 (C) At D70, *DKC1 A386T* mutant iAT2s have a higher fraction of cells positive for p21. (n = 4, \* p < 0.05,  
785 Student's t-Test; scale bars, 10  $\mu$ m)
- 786 (D) At D70, *DKC1 A386T* mutant iAT2s have a higher fraction of cells with TIFs. (n = 4, \* p < 0.05,  
787 Student's t-Test; scale bars, 10  $\mu$ m; Insets highlight cells with TIFs, each one noted by a white  
788 arrowhead)
- 789 (E) Representative TeSLA of *DKC1 A386T* iAT2 alveolospheres shows telomeres shorten with passage.
- 790 (F) Quantification of *DKC1 A386T* iAT2 cell telomere lengths shows a preponderance of short telomeres  
791 appears as the iAT2 cells approach D70, red colored data points highlight telomeres under the 1.6kb  
792 threshold. (n = 2, "Shortest 20%" reports the 20th percentile of telomere length, in Kb)
- 793

**A**

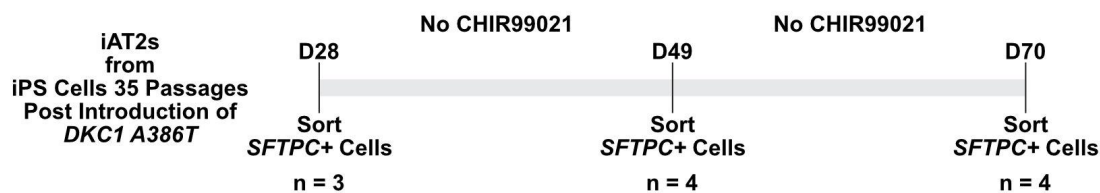

**B**

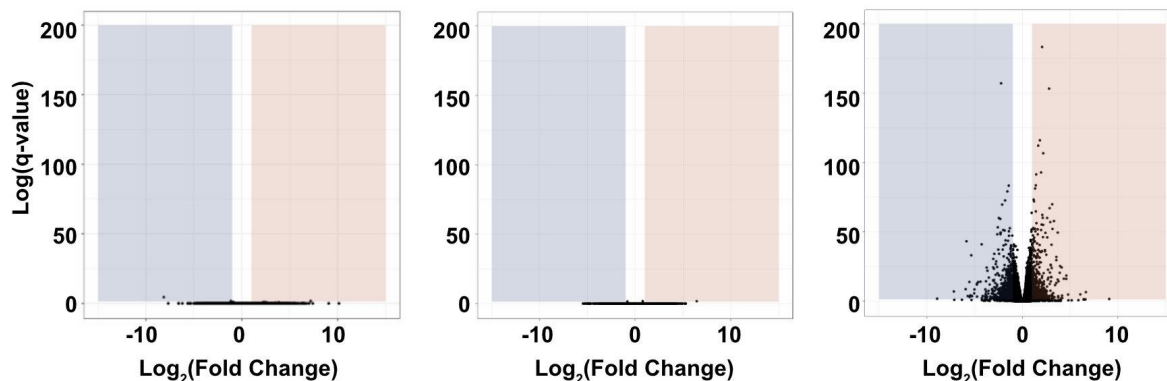

**C**

| Gene Set                                                       | Day 70 NES | Day 70 p-adj |
|----------------------------------------------------------------|------------|--------------|
| REACTOME_WNT5A_DEPENDENT_INTERNALIZATION_OF_FZD2_FZD5_AND_ROR2 | 1.69070396 | 0.02104417   |
| REACTOME_BETA_CATENIN_INDEPENDENT_WNT_SIGNALING                | 1.6795837  | 0.00099486   |
| REACTOME_WNT5A_DEPENDENT_INTERNALIZATION_OF_FZD4               | 1.65435977 | 0.03365137   |
| REACTOME_PCP_CE_PATHWAY                                        | 2.00331167 | 3.7613E-06   |

**D**

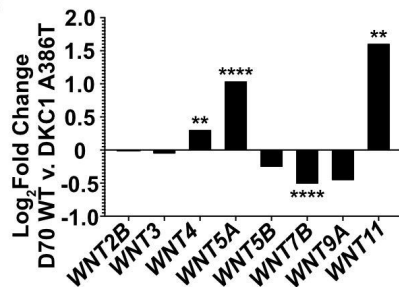

**E**

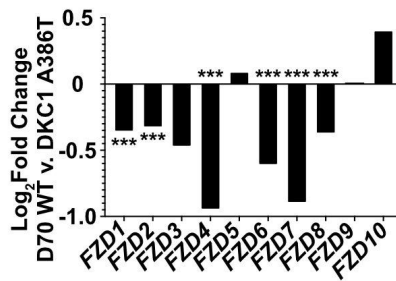

**H**

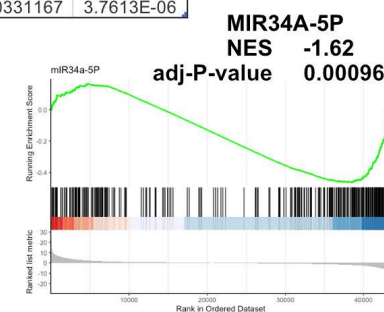

**F**

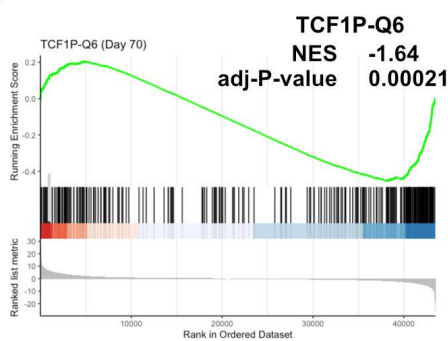

**G**

| Master Regulator | Predicted Activation | Activation z-score | Overlap p-value | Network bias-corrected p-value |
|------------------|----------------------|--------------------|-----------------|--------------------------------|
| Lithium Chloride | Inhibited            | -2.721             | 6.74E-14        | 0.02                           |
| <i>TCF7</i>      | Inhibited            | -2.394             | 1.22E-08        | 0.03                           |
| <i>SFRP4</i>     | Activated            | 2.1                | 1.15E-11        | 1.40E-03                       |
| <i>FRZB</i>      | Activated            | 2.331              | 8.14E-14        | 1.14E-02                       |
| <i>SFRP1</i>     | Activated            | 2.744              | 2.94E-11        | 4.32E-02                       |

**I**

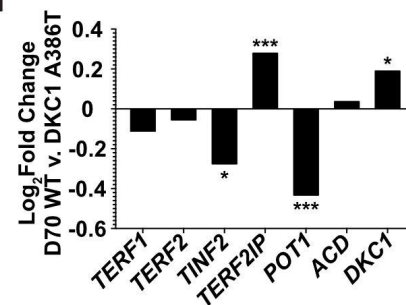

794

795



- 796 **Figure 3. RNA-seq of passaged iAT2 cells reveals a time dependent change in Wnt signaling**  
797 (A) A schematic to show how cells were prepared for RNA-seq.  
798 (B) Volcano plots at D28, D50, and D70 show how the number of differentially expressed genes increases  
799 at D70.  
800 (C) GSEA Analysis at D70 comparing *DKC1 A386T* iAT2 cells reveals an upregulation of non-canonical  
801 Wnt Signaling and the PCP (Planar Cell Polarity) pathway.  
802 (D) RNA-seq analysis shows upregulation of *WNT5A* and *WNT11*, non-canonical WNTs associated with  
803 pulmonary fibrosis. (\*  $p < 0.05$ , \*\*  $p < 0.01$ , \*\*\*  $p < 0.001$ , \*\*\*\*  $p < 0.0001$ , DEseq2 pairwise contrast  
804 statistics)  
805 (E) RNA-seq analysis shows broad downregulation of many *FZD* receptors. (\*  $p < 0.05$ , \*\*  $p < 0.01$ , \*\*\*  $p <$   
806  $0.001$ , \*\*\*\*  $p < 0.0001$ , DEseq2 pairwise contrast statistics)  
807 (F) GSEA Analysis at D70 comparing *DKC1 A386T* iAT2 cells reveals a downregulation of genes with  
808 *TCF7* bindings sites in their promoters.  
809 (G) Ingenuity Pathway Analysis reveals master regulators at D70 including downregulation of Lithium  
810 chloride, *TCF7*, and upregulation of multiple Wnt inhibitors.  
811 (H) GSEA Analysis at D70 comparing *DKC1 A386T* iAT2 cells reveals a downregulation of genes with  
812 *miR34A* binding sites.  
813 (I) *TINF2* and *POT1* are downregulated in *DKC1 A386T* iAT2 cells at D70. (\*  $p < 0.05$ , \*\*  $p < 0.01$ , \*\*\*  $p <$   
814  $0.001$ , DEseq2 pairwise contrast statistics)  
815

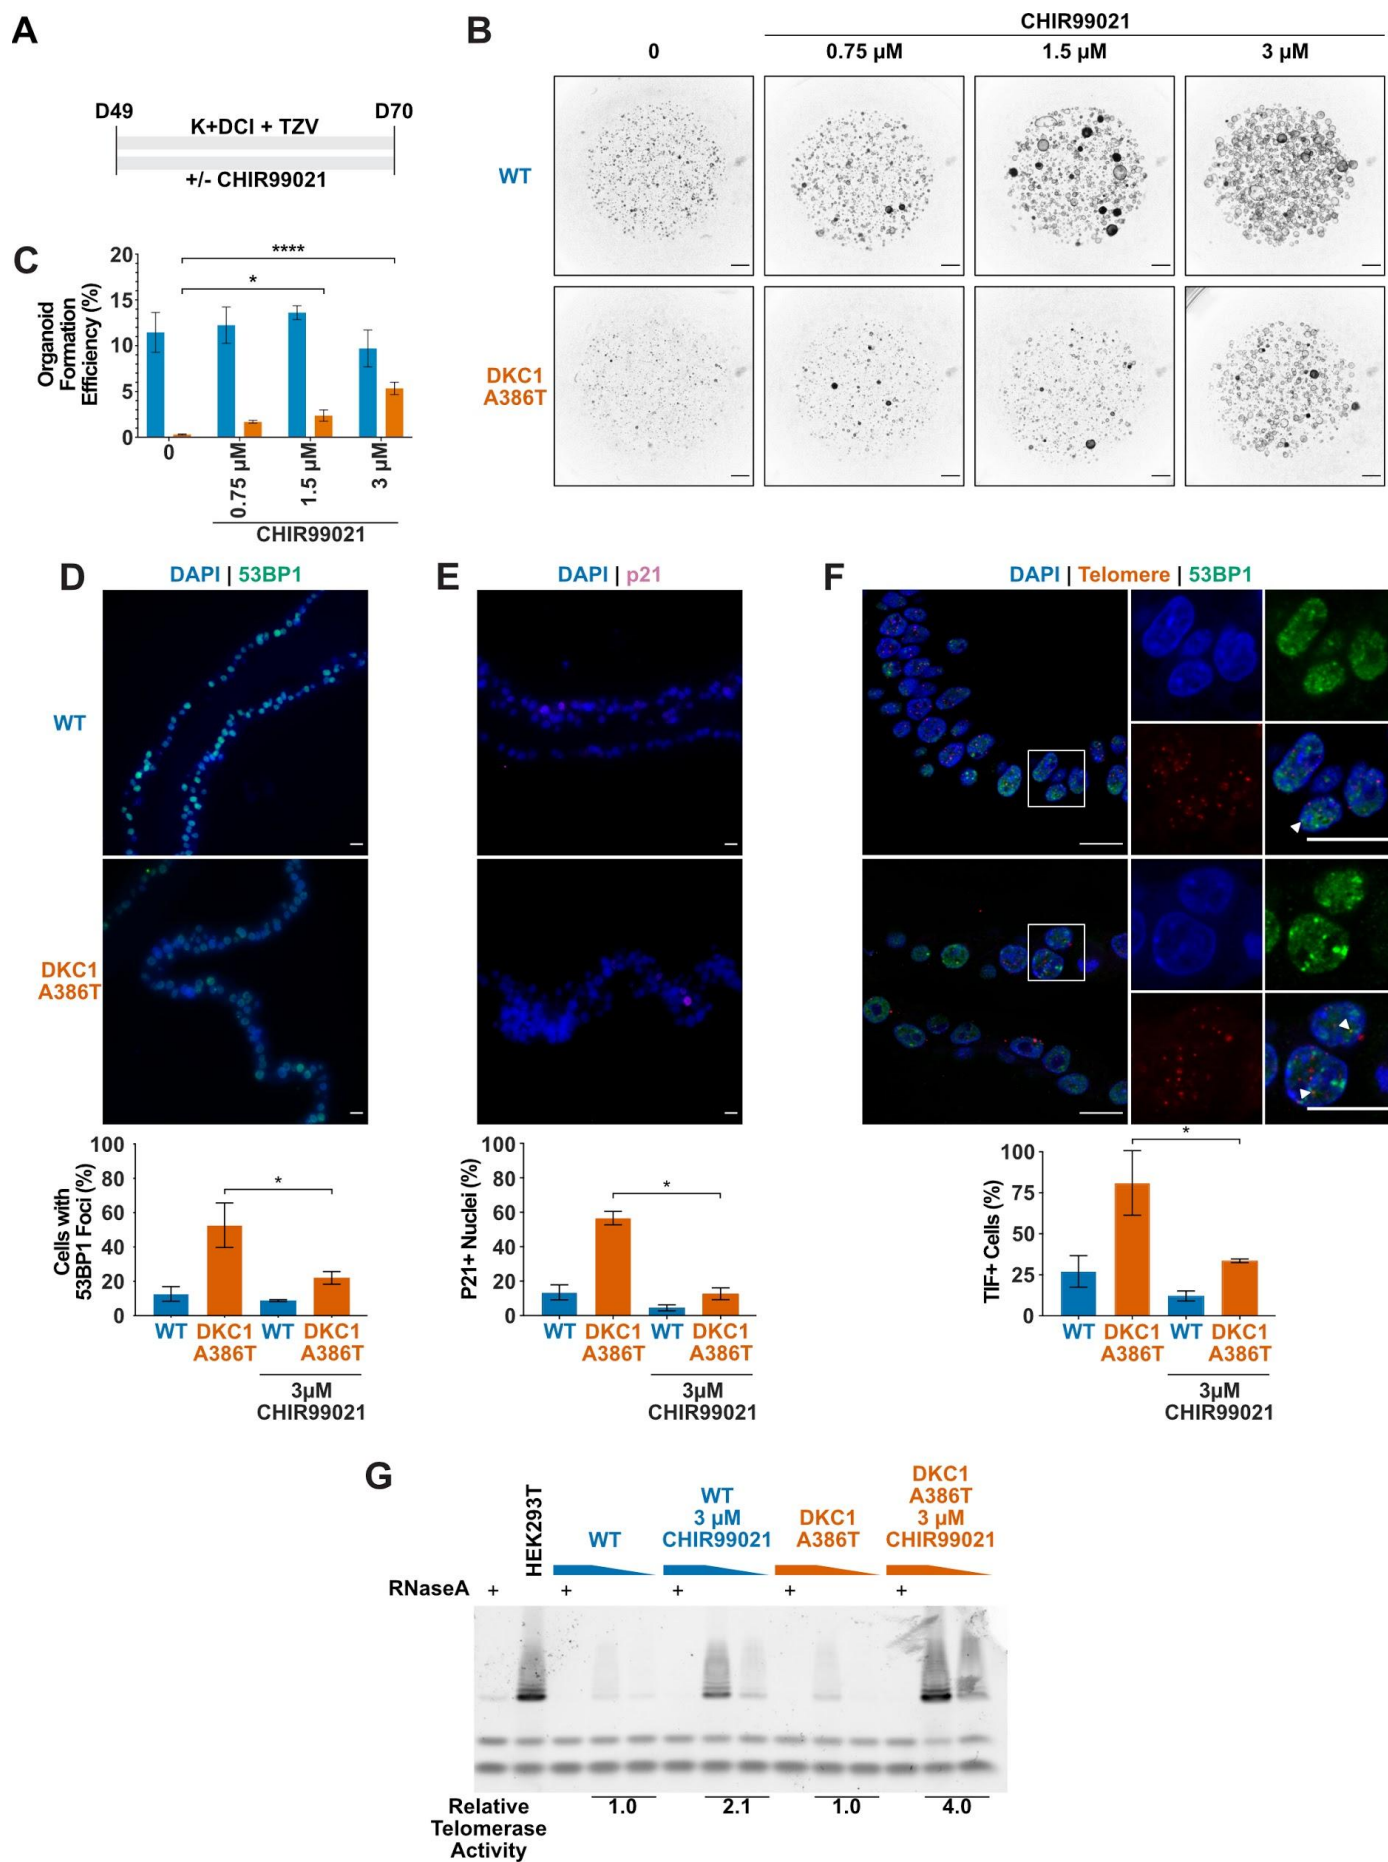

- 817 **Figure 4. CHIR99021 rescues growth and telomere defects in DC iAT2 cell alveolospheres**
- 818 (A) Differentiation protocol used to test how CHIR99021 affects growth of DC iAT2s.
- 819 (B) Representative images of differentiating WT and *DKC1 A386T* mutant bearing cells with increasing
- 820 amounts of CHIR99021. (scale bars, 1 mm for all alveolosphere images)
- 821 (C) Quantifications of alveolosphere formation efficiency after treatment with differing concentrations of
- 822 CHIR99021. (n = 4, \* p < 0.05, \*\*\*\* p < 0.0001, Student's t-test)
- 823 (D) When D70 alveolospheres are cultured with 3  $\mu$ M CHIR99021, *DKC1 A386T* mutant iAT2 cells have a
- 824 lower fraction of cells with 53BP1 foci. Note, data for no CHIR99021 bars are from Figure 2. (n = 3, \* p
- 825 < 0.05, Student's t-test; scale bars, 10  $\mu$ m)
- 826 (E) When D70 alveolospheres are cultured with 3  $\mu$ M CHIR99021, *DKC1 A386T* mutant iAT2 cells have a
- 827 lower fraction of p21 positive cells. Note, data for no CHIR99021 bars are from Figure 2. (n = 3, \* p <
- 828 0.05, Student's t-test; scale bars, 10  $\mu$ m)
- 829 (F) When D70 alveolospheres are cultured with 3  $\mu$ M CHIR99021, *DKC1 A386T* mutant iAT2 cells have a
- 830 lower fraction of TIF positive cells. Note, data for no CHIR99021 bars are from Figure 2. (n = 3, \* p <
- 831 0.05, Student's t-test; scale bars, 10  $\mu$ m; Insets highlight cells with TIFs, each one noted by the white
- 832 arrowheads)
- 833 (G) Telomeric repeat amplification protocol (TRAP) assay for telomerase activity in iAT2 cells using 5-fold
- 834 extract dilutions. (n = 2)
- 835

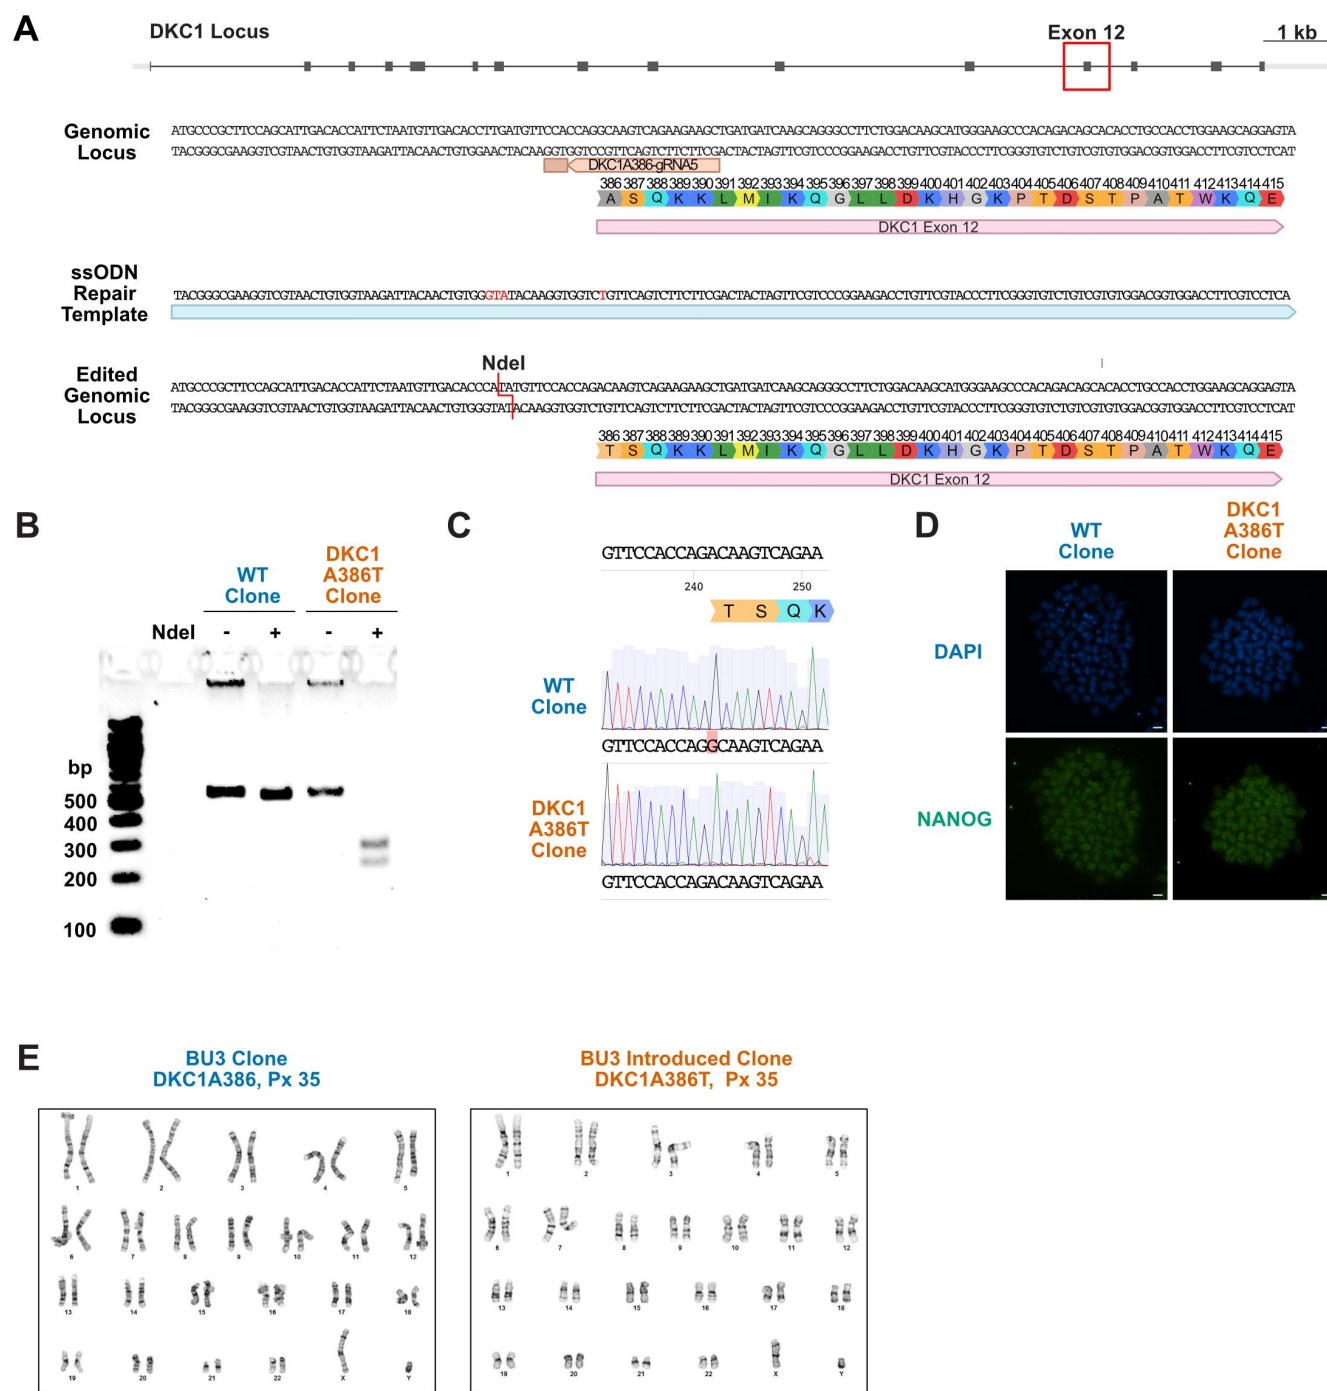

836

837 **Figure S1. Introduction of the *DKC1* A386T mutation into the BU3 *NKX2.1::GFP*,**  
 838 ***SFTPC::TdTomato* iPS Cell Line**

839

(A) CRISPR based editing strategy for introducing the *DKC1* A386T mutation into the BU3 *NKX2.1::GFP*,  
 840 *SFTPC::TdTomato* iPS cell line.

841

(B) Genotyping by RFLP of *DKC1* A386T clonal cell lines and their WT counterparts that also were  
 842 exposed to the CRISPR reagents using the introduced NdeI site.

843

(C) Sanger sequence verification of the introduction of the mutation yielding 1156G>A. Note the WT  
 844 sequence is marked in red.

845

(D) Paired iPS cell clones maintain high expression of NANOG, a marker of pluripotency. (scale bars, 100  
 846 μm)

847

(E) Paired iPS cell clones show normal karyotypes after the introduction of the *DKC1* A386T mutation.

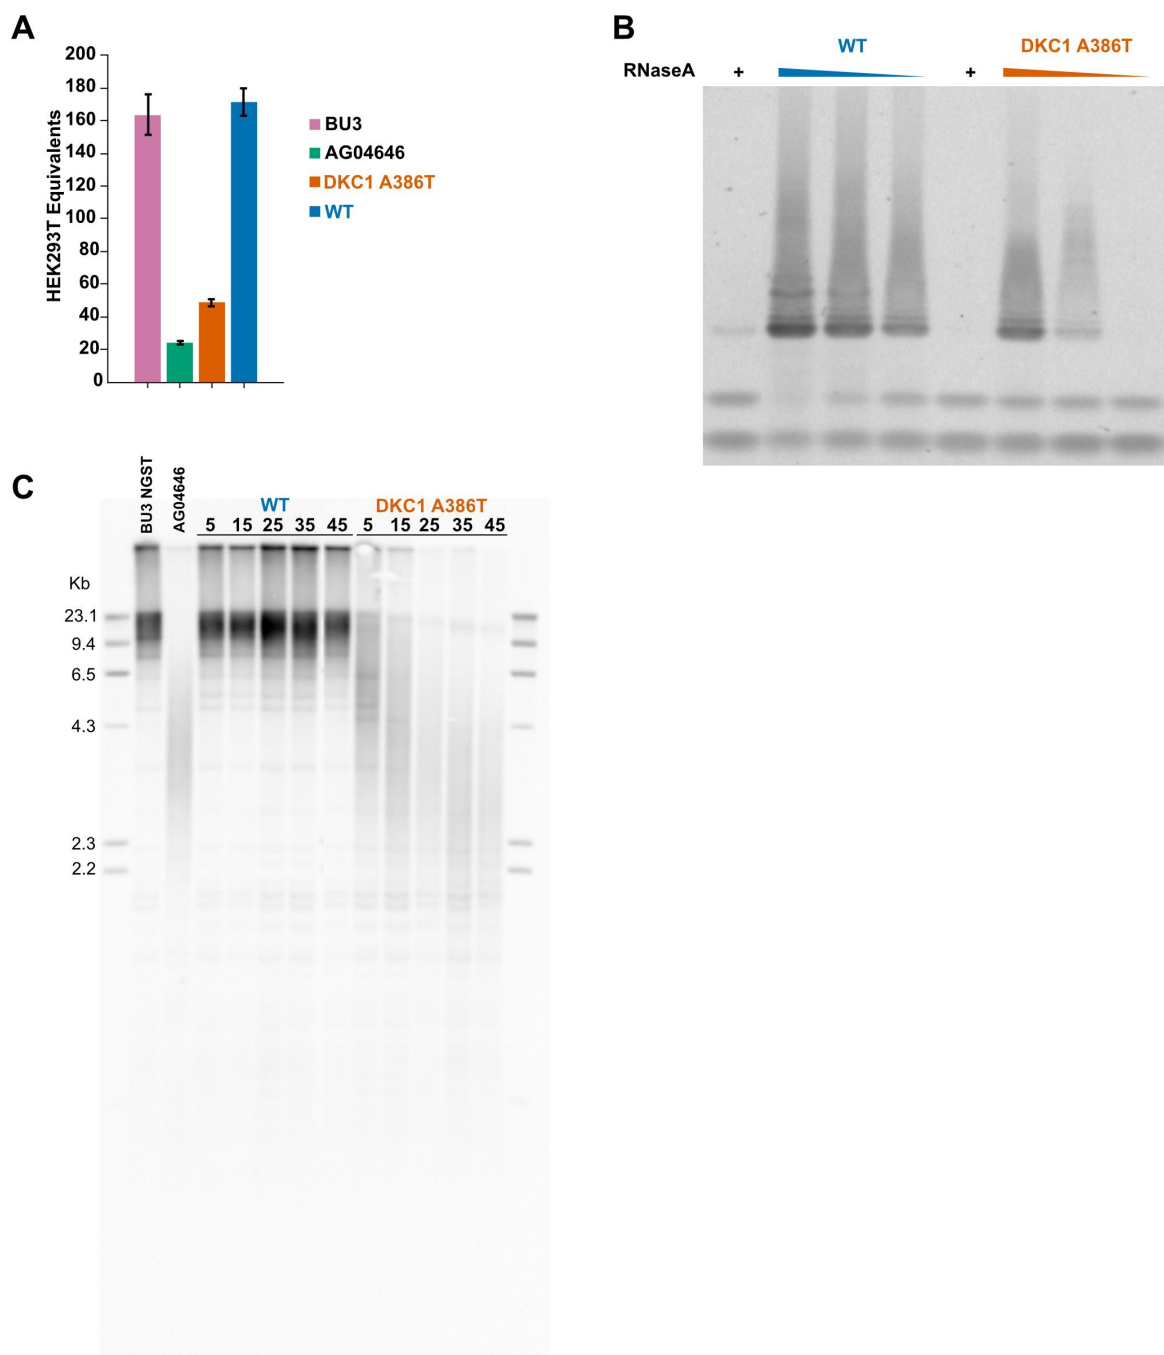

848  
849 **Figure S2. *DKC1 A386T* iPS cells show decreased telomerase activity and telomeres shorten**  
850 **with passage**

851 (A) Quantitative telomeric repeat amplification protocol (qTRAP) assay for telomerase activity in iPS cells  
852 shows a reduction in relative telomerase activity in *DKC1 A386T* introduced lines. (n = 3)  
853 (B) Telomeric repeat amplification protocol (TRAP) assay for telomerase activity in iPS cells using a 5 fold  
854 dilution series of the cellular extracts show a reduction in relative telomerase activity in *DKC1 A386T*  
855 introduced lines.  
856 (C) Terminal restriction fragment (TRF) telomere length analyses in the WT and *DKC1 A386T* paired iPS  
857 cells compared to the parental iPS Line (BU3 NGST) and the patient derived iPS line (AG04646).  
858 Above each lane is the number of passages from the introduction of the mutation.  
859



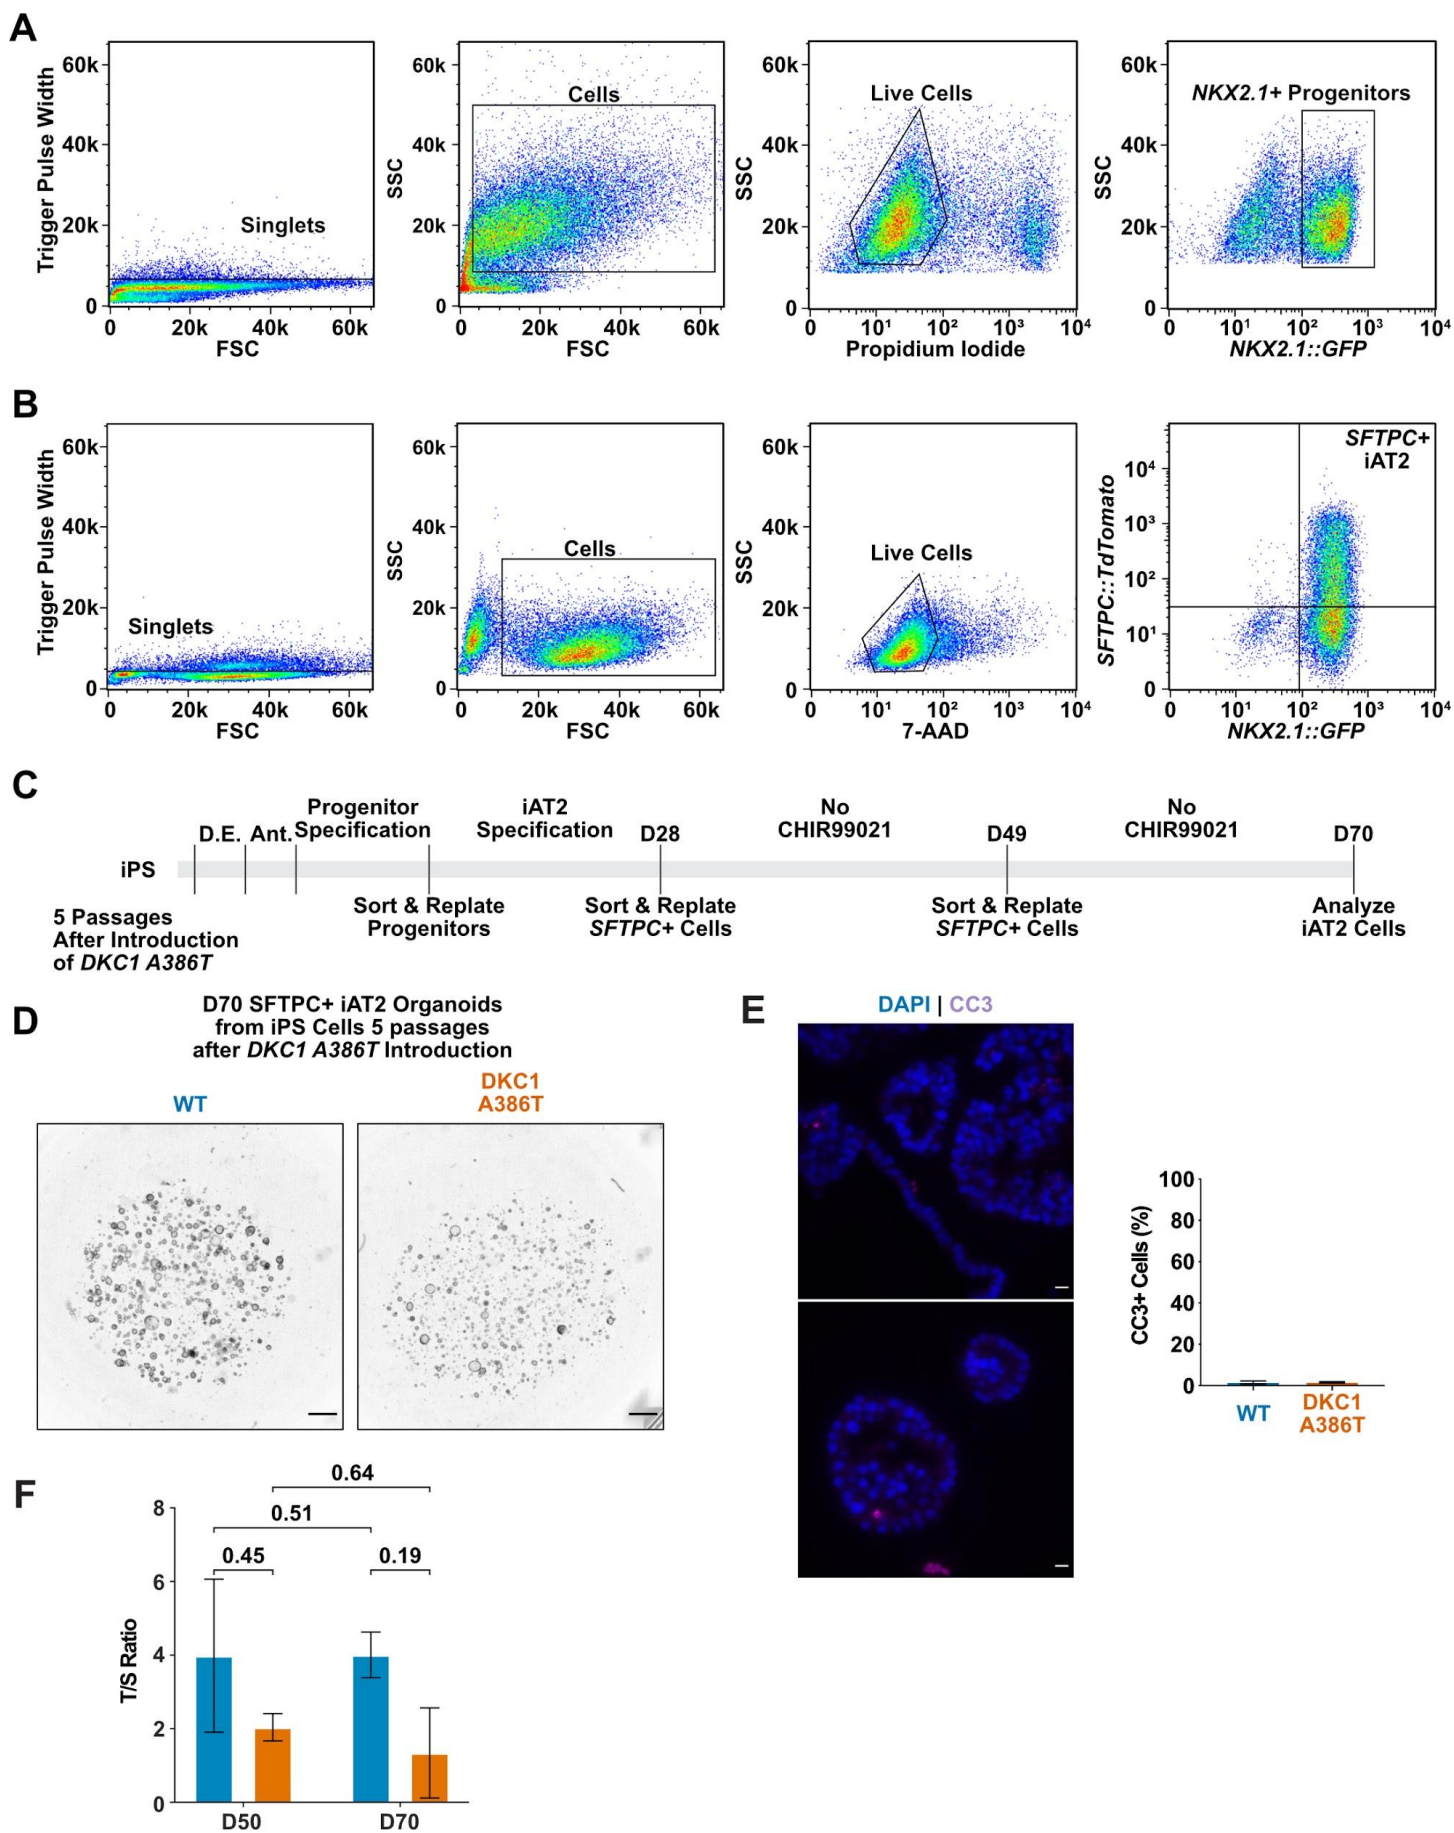



- 861 **Figure S3. Representative sorting strategies and differentiation of early passage iPS cells**  
862 **yields no growth defect**
- 863 (A) Representative sorting strategy for *NKX2.1*+ progenitors.  
864 (B) Representative sorting strategy for *SFTPC*+ cells from iAT2 alveolospheres.  
865 (C) Differentiation protocol used to probe the effects of the *DKC1 A386T* mutation on iAT2 cells. (D.E. -  
866 Definitive Endoderm Specification; Ant. - Anteriorization)  
867 (D) Representative images of differentiating WT and *DKC1 A386T* mutant bearing iAT2 alveolospheres  
868 derived from iPS cells that have undergone 5 passages after introduction of the mutation. (scale bars, 1  
869 mm)  
870 (E) Representative images and quantification of CC3 staining at D70 shows no significant difference  
871 between WT and *DKC1 A386T* mutant iAT2s. (n = 4, no difference, p = 0.96, Student's t-test)  
872 (F) Average telomere length as measured by telomere qPCR of WT and DC iAT2 cells with passage (n =  
873 2, p-values listed on the figure)  
874

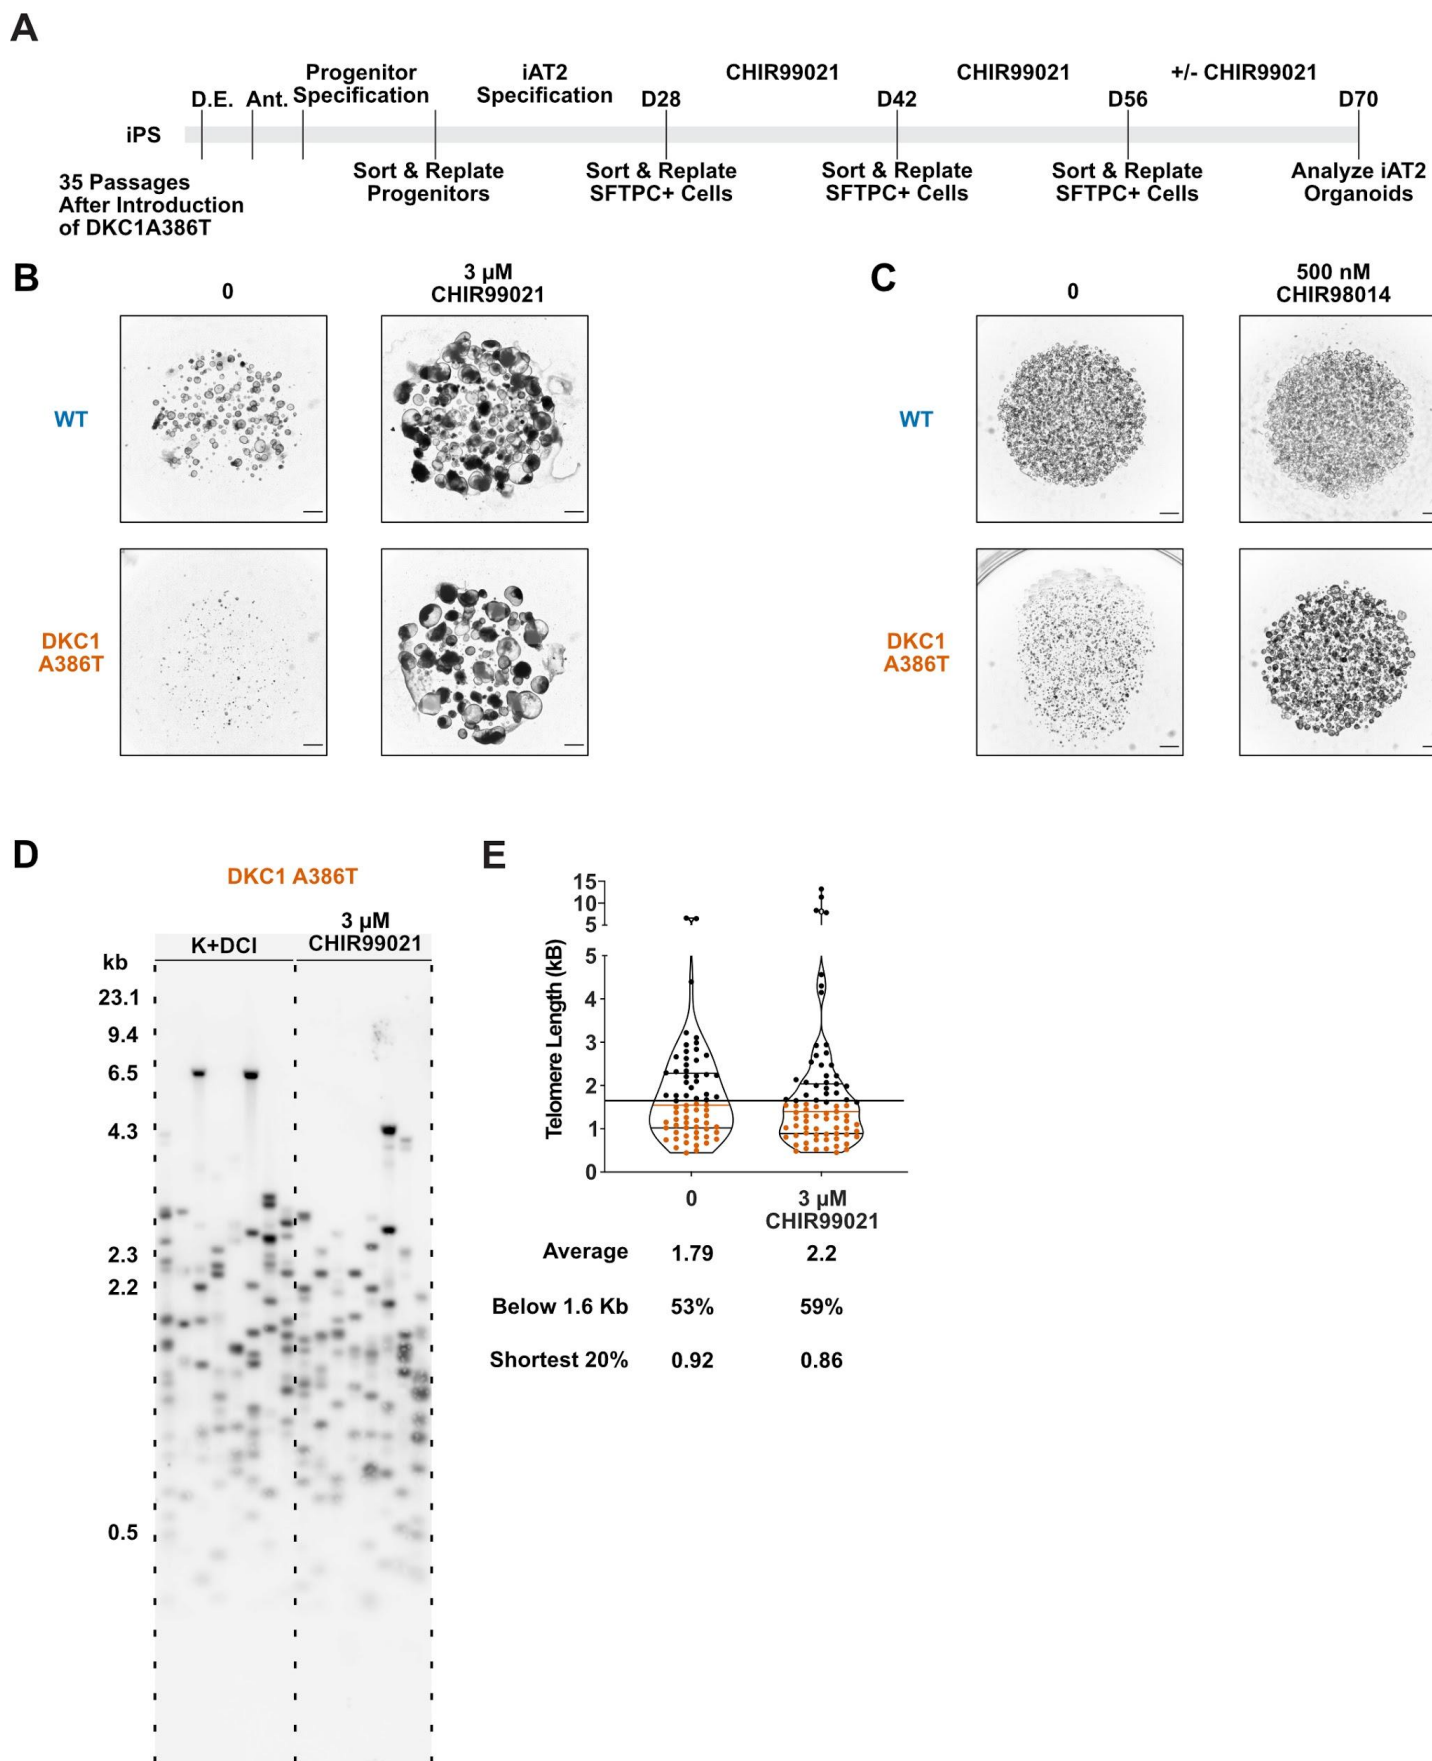

876 **Figure S4. Pre-treatment with CHIR99021 does not prevent the growth defect or lengthen**  
877 **telomeres in DC iAT2 cells**

- 878 (A) Differentiation protocol used to test how pre-treatment culture with CHIR99021 affects growth of DC  
879 iAT2s.
- 880 (B) Representative images of iAT2 alveolospheres at D70 with and without CHIR99021 shows that pre-  
881 treatment does not prevent the defect when CHIR99021 is removed. (scale bars, 1 mm)
- 882 (C) Rescue of DC iAT2 alveolosphere growth with CHIR98014. These alveolospheres grew from cells  
883 plated at 400 cells/ $\mu$ L. (scale bars, 1 mm)
- 884 (D) TeSLA of *DKC1 A386T* iAT2 alveolospheres treated with 3  $\mu$ M CHIR99021 shows no difference in  
885 telomere length.
- 886 (E) Quantification of TeSLA blot of *DKC1 A386T* iAT2 alveolospheres shows no difference in average  
887 telomere length or in fraction of shortest telomeres. (n = 1, "Shortest 20%" reports the 20th percentile of  
888 telomere length, in Kb)

889  
890 **Tables**

891  
892 **Supplementary Table 1. Differentially expressed pathways from D70 DC iAT2 cells that are**  
893 **similar to changes seen in IPF**

894 These tables display selected results from GSEA and IPA analyses that highlight pathways found to  
895 be differentially regulated in mutant iAT2 cells at D70 when compared to wildtype cells. The first table  
896 displays GSEA results along with the pathway name, normalized enrichment score (NES) and  
897 adjusted p-value (D70 p-adj). The second table displays IPA results from the Canonical Pathways  
898 analysis. These are gene sets that are differentially regulated in mutant iAT2 cells at D70 when  
899 compared to wildtype cells. The p-value reports the significance of enrichment of the molecules in  
900 that gene set, and the activation score reports how concordant the gene expression changes are with  
901 what is predicted from the literature embedded in IPA (a negative z-score argues that the gene set is  
902 down regulated in the mutant iAT2 cells, whereas a positive z-score argues that the gene set is  
903 upregulated in mutant iAT2 cells; the lack of a z-score is indicative there was insufficient evidence to  
904 provide a z-score.) The "molecules" column lists the genes that were in that gene set that were also  
905 found in our differentially expressed gene list when comparing mutant iAT2 cells to wildtype cells.

906  
907 **Supplementary Table 2. GSEA results comparing D70 DC to WT iAT2 cells**

908 These tables provide the unedited output of the GSEA analysis using the C2 curated gene sets, H  
909 hallmark gene sets, and C3 regulatory target gene sets when comparing D70 mutant to wild type  
910 iAT2 cells. The table reports the name of the gene set (ID), the size of the gene set (setSize), the raw  
911 enrichment score (enrichmentScore), the normalized enrichment score (NES), along with the p-value,  
912 the adjusted p-value (p.adjust) and false discovery rate q-value (q-values). The "coreenrichment"  
913 column displays the genes in the gene set.

914  
915 **Supplementary Table 3. IPA results comparing D70 DC to WT iAT2 cells**

916 These tables provide the unedited output of the IPA analysis. The summary tab lists metadata  
917 associated with the analysis. The "Analysis Ready Molecules" lists the differentially expressed genes  
918 that differed in expression >2 fold and were associated with an adjusted p-value < 0.05 from D70  
919 mutant iAT2 cells (DEG list). The "Canonical Pathways tab" lists pathways curated from the literature  
920 and the p-value for enrichment using the DEG list used in the IPA analysis. The "Upstream  
921 Regulators" tab lists the transcription factors, cytokines and other genetic regulators whose target  
922 genes are in the DEG list. "Causal Networks" seeks to build a regulatory network based off of the  
923 "Upstream Regulators" to identify master regulators of the DEG list. For more information on  
924 interpreting ingenuity analysis results see (Krämer et al., 2014).

925

926 **Key Resource Table**
